# Fatty acid starvation activates RelA by depleting lysine precursor pyruvate

Anurag Kumar Sinha<sup>1\*</sup>, Kristoffer Skovbo Winther<sup>1</sup>, Mohammad Roghanian<sup>2</sup> and Kenn Gerdes<sup>1\*</sup>

<sup>1</sup>Centre of Excellence for Bacterial Stress Response and Persistence,

Department of Biology,

University of Copenhagen,

Ole Maaløes Vej 5,

2200 Copenhagen N,

Denmark

<sup>2</sup>Department of Molecular Biology,

Umeå University,

901 87 Umeå,

Sweden

**Running title:** Fatty acid starvation activates (p)ppGpp synthetase I

\*Corresponding authors: [anurag.sinha@bio.ku.dk](mailto:anurag.sinha@bio.ku.dk), [kgerdes@bio.ku.dk](mailto:kgerdes@bio.ku.dk)

## 29 Summary

30 Bacteria experiencing nutrient starvation induce the ubiquitous stringent response, a profound  
 31 physiological change that reprograms cell physiology from fast to slow growth and stress survival.  
 32 The stringent response is mediated by the secondary messengers pppGpp and ppGpp collectively  
 33 referred to as (p)ppGpp or “alarmone”. In *Escherichia coli*, two paralogs, RelA and SpoT,  
 34 synthesize (p)ppGpp. RelA is activated by amino acid starvation whereas SpoT, which can also  
 35 degrade (p)ppGpp, responds to fatty acid (FA), carbon and phosphate starvation. Here, we discover  
 36 that FA starvation leads to rapid activation of RelA and reveal the underlying mechanism. We show  
 37 that fatty acid starvation leads to depletion of lysine that, in turn, leads to the accumulation of  
 38 uncharged tRNA<sup>lys</sup> and activation of RelA. SpoT was also activated by fatty acid starvation but to a  
 39 lower level and with a delayed kinetics. Next, we discovered that pyruvate, a precursor of lysine, is  
 40 depleted by FA starvation. We also propose a mechanism that explains how FA starvation leads to  
 41 pyruvate depletion. Together our results indicate that many responses to nutrient depletion may  
 42 ultimately result indirectly from depletion of amino acids and thereby activating RelA.  
 43 Interestingly, FA starvation provoked a ~100-fold increase in *relA* dependent ampicillin tolerance.

44

45 **Keywords:** RelA, SpoT, fatty acid starvation, cerulenin, triclosan, stringent response, ppGpp,  
 46 lysine, pyruvate

47



## 48 Introduction

49 Bacteria growing in the environment often experience limiting accessibility of nutrients. Under such  
50 conditions, bacteria mount the stringent response that alters the levels of a wide range of gene  
51 transcripts and metabolites ([Traxler et al., 2008](#), [Durfee et al., 2008](#), [Sanchez-Vazquez et al., 2019](#)).  
52 These global changes are controlled by the secondary messengers pppGpp and ppGpp, the effector  
53 molecules of the stringent response collective called (p)ppGpp or “alarmone”. Importantly,  
54 (p)ppGpp is required for almost all pathogenic bacteria to be virulent and in a number of cases also  
55 for expressing antibiotic tolerance ([Dalebroux et al., 2010](#), [Harms et al., 2016](#)). In addition, the  
56 levels of (p)ppGpp vary inversely with bacterial growth-rates during balanced growth, allowing for  
57 adjustment of cellular growth-parameters also in the absence of external stress ([Potrykus et al.,](#)  
58 [2011](#)).

59  
60 In *E. coli*, two paralogous enzymes, RelA and SpoT, are responsible for the metabolism of  
61 (p)ppGpp ([Ronneau & Hallez, 2019](#)). RelA has (p)ppGpp synthetase activity whereas SpoT has  
62 both synthetase and hydrolase activities. During amino acid starvation, RelA associates with  
63 uncharged tRNA and this binary complex is loaded at “hungry” ribosomal A-sites thereby leading  
64 to activation of RelA ([Brown et al., 2016](#), [Loveland et al., 2016](#), [Arenz et al., 2016](#), [Winther et al.,](#)  
65 [2018](#), [Kushwaha et al., 2019](#)). Accumulation of (p)ppGpp leads to major changes in bacterial  
66 physiology: transcription of rRNA and tRNA operons is strongly reduced, whereas transcription of  
67 amino acid biosynthetic operons is stimulated to replenish amino acids pools ([Durfee et al., 2008](#),  
68 [Traxler et al., 2008](#)). High (p)ppGpp levels thus lead to slow growth or growth arrest. After  
69 readjusting cellular physiology, SpoT hydrolyses (p)ppGpp and thereby allowing resumption of cell  
70 growth at an adjusted rate ([Potrykus & Cashel, 2008](#)). *ΔrelA ΔspoT* double mutant strains (also  
71 called (p)ppGpp<sup>0</sup> strains) are unable to synthesize (p)ppGpp and die in minimal media but can grow

in rich media ([Xiao et al., 1991](#)). Such strains exhibit auxotrophy for multiple amino acids, survive less well during stationary phase and exhibit aberrant cell morphology ([Hauryliuk et al., 2015](#), [Dalebroux et al., 2010](#)).

While the mechanism of RelA activation during aa starvation is well understood ([Kushwaha et al., 2019](#), [Winther et al., 2018](#)), it is more unclear as to how other starvation conditions lead to the accumulation of (p)ppGpp. A number of studies implicate SpoT in (p)ppGpp accumulation during multiple stress conditions, including fatty acid (FA) starvation, either by reducing SpoT-dependent (p)ppGpp-hydrolase or by increasing (p)ppGpp-synthetase activity, or both ([Xiao et al., 1991](#), [Seyfzadeh et al., 1993](#), [Vinella et al., 2005](#), [Spira et al., 1995](#), [Wang et al., 2016](#), [Kim et al., 2018](#)).

Inhibition of FA chain elongation by the drug cerulenin, which inhibits FabB/FabF ([Fig. 1A](#)), stimulates SpoT synthetase activity ([Battesti & Bouveret, 2006](#), [Seyfzadeh et al., 1993](#)). SpoT is believed to sense FA limitation by interaction with Acyl Carrier Protein (ACP), the central cofactor of FA synthesis ([Battesti & Bouveret, 2006](#), [Battesti & Bouveret, 2009](#)). Remarkably, while Nomura and coworkers showed that SpoT synthesizes ppGpp under FA starvation. The contribution of RelA to synthesize ppGpp under this condition was not analysed ([Seyfzadeh et al., 1993](#)).

Here we show that inhibition of FA synthesis in *wt* cells causes rapid accumulation of uncharged lysine tRNA, activation of RelA and synthesis of (p)ppGpp. Consistently, addition of lysine to the growth media abolishes RelA activation after FA starvation. Addition of pyruvate, an essential precursor of lysine and FA synthesis significantly reduces RelA activation. Interestingly, under FA starvation, the *wt* strain exhibited an almost 100-fold increased level in antibiotic tolerance as compared to the  $\Delta relA$  mutant cells, an effect that was abolished by the addition of lysine. Based on

these results, we propose that increased consumption of pyruvate under FA starvation leads to lysine starvation and activation of RelA that, in turn, explains the increased antibiotic tolerance.

## Results

### *Fatty acid starvation induces rapid RelA-dependent accumulation of ppGpp*

We measured (p)ppGpp accumulation after treating cells of strain MG1655 (*wt*) and its  $\Delta relA$  derivative with cerulenin. In the *wt* strain, we saw an immediate and strong increase in the level of ppGpp whereas the response of the  $\Delta relA$  strain was much slower and at no point reached the level of the *wt* strain (Fig. 1B). Only ppGpp accumulated since almost no pppGpp was observed after cerulenin treatment. Quantification of the response revealed that ppGpp level reached  $\approx 60\%$  of total labelled nucleotides (ppGpp + GTP) within 5 minutes in the *wt* strain, and then decreased to a level of 40-50% (Fig. 1C). In the  $\Delta relA$  strain, the [ppGpp] increased very slowly with less than 10% ppGpp accumulated in the first 5 minutes, increasing slowly up to  $\sim 25\%$  in 30 minutes (Fig. 1C). These results show that RelA is responsible for the rapid ppGpp accumulation during FA starvation. It should be noted that *wt* and *relA* strains exhibited similar MICs toward cerulenin, excluding the possibility that the reduced level of ppGpp in the *relA* strain was due to different sensitivity of the cells (Fig. S1A).

### *Inhibition of fatty acid synthesis induces lysine starvation*

Addition of all 20 amino acids to *wt E. coli* cells growing in minimal medium prevented ppGpp accumulation during cerulenin treatment, indicating that inhibition of FA synthesis induces amino acid starvation (Seyfzadeh *et al.*, 1993). To further analyse this phenomenon, we measured ppGpp accumulation in the presence of polar (Mix A) or non-polar amino acids (Mix B) (Fig. 2A). Addition of Mix A drastically reduced ppGpp accumulation upon cerulenin treatment (Figs 2A and

119 S2A). Mix A was sub-divided into three groups: Mix X (alanine, arginine and asparagine), Mix Y  
 120 (aspartate, glutamate and glutamine) and Mix Z (glycine, histidine, serine and lysine).  
 121 Supplementation of mix Z decreased ppGpp accumulation similar to mix A, whereas addition of  
 122 mix X and mix Y had no effect (Figs 2B and S2B). Further deconvolution of Mix Z revealed that  
 123 lysine alone was sufficient to suppress RelA activation (Figs 2C and S2C-D). We observed that  
 124 0.4mM lysine supplementation unable to completely suppress RelA activation at early time points  
 125 (5 and 10 minutes time points) probably due to high uncharging of lysine tRNA (shown below). We  
 126 could not supplement higher amount of lysine as at higher amount it feedback inhibits lysC, first  
 127 common enzyme for synthesis of methionine, threonine and lysine. The above experiments were  
 128 accomplished using a high concentration of cerulenin (200 µg/ml; ~4X MIC). However, lysine  
 129 supplementation abolished RelA dependent ppGpp accumulation also at a low concentration of  
 130 cerulenin (50 µg/ml; ~1X MIC; Fig. 2D).

131  
 132 To investigate FA inhibition in general leads to lysine starvation, we analysed the response to  
 133 triclosan that inhibits FA synthesis by targeting FabI (Fig. 1A) (Heath & Rock, 1999). Similar to  
 134 cerulenin treatment, *wt* cells accumulated more than 60 % of ppGpp within 5 minutes of triclosan  
 135 addition and then slowly decreased to ~40 % in ~30' (Fig. S3). In the  $\Delta relA$  strain, the ppGpp level  
 136 increased much slower and was in the range of 10-15 % of that of the *wt*, very similar to the result  
 137 with cerulenin (Fig. 1B and 1C). Again, supplementation of lysine curtailed ppGpp accumulation in  
 138 the *wt* strain, and after 15 minutes of treatment, the level was comparable to that of the  $\Delta relA$  strain  
 139 (Figs S3A and S3B). In summary, our results show that inhibition of FA synthesis depletes the  
 140 lysine pool that, in turn, activates RelA to synthesize ppGpp.

141  
 142 *Fatty acid starvation induces accumulation of uncharged tRNA<sup>Lys</sup>*

143 To further substantiate this conclusion, we analysed the charging levels of tRNA<sup>lys</sup> by Northern  
 144 blotting analysis. In *wt* cells, the level of uncharged tRNA<sup>lys</sup> increased from 12% before treatment to  
 145 72%, 5 minutes after triclosan treatment (Fig. 3A). Addition of lysine reduced uncharged tRNA<sup>lys</sup>  
 146 levels to only 09%, similar to before starvation (Fig. 3A). Next, we analysed the effect of FA  
 147 starvation on the charging level in a  $\Delta relA$  strain. Here, a relatively high level of uncharged tRNA<sup>lys</sup>  
 148 was present already before starvation (22%) that increased to 78% after 5 minutes with triclosan.  
 149 Similar to *wt* cells, lysine supplementation reduced uncharged tRNA<sup>lys</sup> to 27%. (Fig. 3A).  
 150 We also monitored the kinetics of uncharging of tRNA<sup>lys</sup> after triclosan treatment both in *wt* and in  
 151  $\Delta relA$  cells (Fig. S4A & C). Interestingly, in  $\Delta relA$  cells, level of uncharged tRNA<sup>lys</sup> increased up to  
 152 ~70%, 5 minutes after triclosan treatment and remained uncharged until 15 minutes (Fig. S4C).  
 153 However, in *wt* cells, level of uncharged tRNA<sup>lys</sup> increased up to ~70% at 5 minutes after triclosan  
 154 treatment and then started decreasing at 10 minutes time point and went back to before starvation  
 155 level at 15 minutes after treatment (Fig. S4A). This indicates that RelA mediated ppGpp produced  
 156 in *wt* cells acts quickly to replenish the lysine pool by adjusting cellular physiology, which does not  
 157 occur efficiently in  $\Delta relA$  strain.  
 158 To investigate of the effect of FA starvation was specific to tRNA<sup>lys</sup>, we also analysed tRNA<sup>ser</sup>.  
 159 Indeed, we found no accumulation of uncharged tRNA<sup>ser</sup> (Fig. 3B and Fig. S4B & D). In  
 160 conclusion, FA starvation specifically depletes the lysine pool, resulting in specific and high  
 161 increase in the level of uncharged tRNA<sup>lys</sup>.

## 162 163 *Pyruvate prevents depletion of lysine during fatty acid starvation*

164 To investigate the mechanism of lysine depletion, we thought possible that FA starvation could  
 165 either provoke lysine degradation or inhibit lysine biosynthesis. The major pathway of lysine  
 166 degradation occurs through its decarboxylation by two lysine decarboxylases: CadA and LdcC

167 ([Keseler et al., 2017](#), [Reitzer, 2005](#)). To test first possibility, we analysed a *cadA ldcC* strain during  
168 FA starvation. However, the double deletion strain accumulated ppGpp similar to *wt* when treated  
169 with cerulenin, showing that degradation is probably not responsible for observed lysine depletion  
170 (Fig. S5).

171  
172 The alternative possibility is that FA starvation inhibits lysine biosynthesis. In *E. coli*, lysine is  
173 synthesized from aspartate ([Keseler et al., 2017](#)). Interestingly, two initial steps for the lysine,  
174 threonine and methionine biosynthesis pathways are common and they all utilize common substrate  
175 called aspartate 4-semialdehyde. The first unique step, also considered as the rate-limiting step, for  
176 lysine biosynthesis, is catalyzed by DapA (4-hydroxy-tetrahydrodipicolinate synthase). DapA  
177 catalyzes condensation of aspartate-4-semialdehyde and pyruvate to generate (2S,4S)-4-hydroxy-  
178 2,3,4,5-tetrahydrodipicolinate ([Laber et al., 1992](#)) (Fig. 4A). Since, FA starvation only affects lysine  
179 and not aspartate, threonine or methionine, we exclude the possibility of any major change in the  
180 level of aspartate 4-semialdehyde. The other substrate of DapA is pyruvate. Pyruvate is also needed  
181 for synthesis of acetyl-CoA, the precursor of FA biosynthesis (Fig. 1A). Interestingly, previous  
182 reports showed FA starvation causes reduction in acetyl-CoA levels ([Heath & Rock, 1995](#),  
183 [Furukawa et al., 1993](#)). Therefore, we hypothesized that, during FA starvation, pyruvate will be  
184 utilized to replenish acetyl-CoA and thus will not be available for DapA to synthesize lysine.

185  
186 To test this hypothesis, we grew cells of the *wt* strain in MOPS minimal medium supplemented with  
187 pyruvate. Indeed, addition of 2% pyruvate dramatically reduced the (p)ppGpp level (Fig. 4B and  
188 Fig. S6A). In this experiment, glycerol was used as carbon source (instead of glucose) because  
189 transport of pyruvate is more efficient in glycerol media ([Kreth et al., 2013](#)). This led to a somewhat  
190 lower rate of (p)ppGpp accumulation (compare Figs 1C and 4B). Pyruvate-dependent suppression

of RelA activation is specific to FA starvation as pyruvate addition only slightly affected RelA activation during induced isoleucine starvation (Fig. S6B).

We then directly quantified cellular pyruvate levels upon triclosan treatment. Remarkably, triclosan treatment immediately reduced cellular pyruvate levels up to 40-50 % compared to pre-treatment levels in both *wt* and in  $\Delta relA$  strains (Fig. 4C), further substantiating our hypothesis that FA starvation leads to depletion of pyruvate.

# *Fatty acid starvation induces ppGpp-dependent ampicillin tolerance*

High cellular levels of (p)ppGpp induce antibiotic tolerance in *E. coli* (Dalebroux *et al.*, 2010, Rodionov & Ishiguro, 1995, Kusser & Ishiguro, 1985, Rodionov & Ishiguro, 1996). Therefore, we analysed antibiotic tolerance after treatment with cerulenin/triclosan. The *wt* strain exhibited an almost 100-fold increased ampicillin tolerance as compared to the  $\Delta relA$  strain when starved for FA (Fig. 5A and 5B). Ampicillin tolerance was abolished when lysine was added to the growth medium (Fig. 5A and 5B). Addition of valine that, in *E. coli* K-12, induces isoleucine starvation, also induced *relA*-dependent ampicillin tolerance (Fig. 5C), confirming earlier observations (Kusser & Ishiguro, 1985). Addition of higher doses of cerulenin (200  $\mu$ g/ml; ~4X MIC) made almost all cells refractory to ampicillin killing both in *wt* and in  $\Delta relA$  cells (Fig. S7A and S7B). These results show that activation of RelA by low levels of FA starvation is sufficient to confer antibiotic tolerance and that such tolerance can be eliminated by lysine supplementation. Thus, the ppGpp-mediated ampicillin tolerance cannot simply be explained by slow growth, as cerulenin treatment induced similar growth arrest in both *wt* and  $\Delta relA$  strains at low concentration of cerulenin (50  $\mu$ g/ml; ~1X MIC; Fig. S7C).

## 215 Discussion

216 Here we show that RelA is the major contributor to the accumulation of (p)ppGpp during FA  
 217 starvation. As described previously ([Seyfzadeh et al., 1993](#)), SpoT also contributes, but by a  
 218 significantly lower level ([Fig. 1](#)). This unexpected observation led us to test if supplement of  
 219 exogenous amino acids would prevent activation of RelA. Indeed, addition of lysine abrogated  
 220 RelA activation ([Fig. 2](#)). Consistently, FA starvation of the *wt* strain increased the ratio of  
 221 uncharged to charged tRNA<sup>lys</sup> ([Fig. 3 and S4A](#)). FA starvation of the *ΔrelA* strain led to an even  
 222 stronger and persistent increase of the level of uncharged tRNA ([Fig. 3A, right panel](#)), consistent  
 223 with the notion that (p)ppGpp curtails translation and consumption of aa during starvation ([Svitil et](#)  
 224 [al., 1993](#), [Rojas et al., 1984](#)).

225  
 226 FA starvation leads to a rapid and strong reduction of the level of pyruvate ([Fig. 4C](#)). Since  
 227 pyruvate is a precursor of lysine ([Fig. 4A](#)), we hypothesized that addition of pyruvate to the growth  
 228 medium would counteract accumulation of (p)ppGpp due to replenishment of the lysine pool, a  
 229 prediction that we indeed were able to confirm ([Fig. 4B](#)). In exponentially growing cells, 90% of  
 230 CoA is present as acetyl-CoA and the synthesis and utilization of acetyl-CoA is strictly regulated  
 231 ([Heath & Rock, 1995](#)). The first step of FA synthesis is catalyzed by acetyl-CoA carboxylase  
 232 (ACC) that uses acetyl-CoA to make malonyl-CoA ([Fig. 1A](#)). Inhibition of FA synthesis by  
 233 cerulenin (or thiolactomycin) led to an almost 100-fold increase in the malonyl-CoA pool and a  
 234 concomitant 80-90% decrease in the acetyl-CoA pool within 2.5 minutes ([Heath & Rock, 1995](#),  
 235 [Furukawa et al., 1993](#)). Similarly, accumulation of malonyl-CoA was also reported when cells  
 236 expressing temperature sensitive enoyl-CoA reductase (FabI<sup>ts</sup>) were shifted to non-permissive  
 237 temperature, indicating that this drastic metabolic change is common to inhibition of FA  
 238 biosynthesis ([Heath & Rock, 1995](#)).



239

240 Based on our results and previous observations, we present a model explaining how FA starvation  
 241 activates RelA (Fig. 6). The ACC enzyme is feedback inhibited by long-chain acyl-ACP, the  
 242 terminal products of FA biosynthesis (Davis & Cronan, 2001, Parsons & Rock, 2013). Inhibition of  
 243 FA chain elongation (by cerulenin or triclosan) would curtail synthesis of long-chain acyl-ACP and  
 244 hence ACC will not be feedback inhibited and will keep utilizing acetyl-CoA to producing  
 245 malonyl-CoA. In turn, such futile consumption of acetyl-CoA will drive continuous synthesis of  
 246 acetyl-CoA from pyruvate, ultimately depleting pyruvate. Since pyruvate is an essential substrate  
 247 for lysine synthesis, the low level of pyruvate would in turn curtail lysine synthesis and thereby  
 248 explain the observed accumulation of uncharged tRNA<sup>lys</sup> and activation of RelA (Fig. 6).

249

250 Thus, pyruvate appears to be the connecting link between FA starvation and lysine starvation.  
 251 Pyruvate plays an important role in general metabolism. For instance, many amino acids directly or  
 252 indirectly use pyruvate for their synthesis; and acetyl-CoA synthesized from pyruvate can either be  
 253 used for FA synthesis or enter the TCA cycle. Using *E. coli* cell extracts, it was shown that pyruvate  
 254 supplementation partially relieves valine-induced inhibition of isoleucine biosynthesis, since  
 255 pyruvate is one of the substrates in the reaction inhibited by valine (Fig. S6C) (Leavitt & Umbarger,  
 256 1962). However, an excess of pyruvate did not cause a significant reduction in ppGpp accumulation  
 257 upon valine treatment (Fig. S6B). Considering the importance of pyruvate, it is understandable that  
 258 many genes encoding enzymes involved in pyruvate metabolism are upregulated during the  
 259 stringent response with an overall effort of the cell to maintain pyruvate at a sustainable level  
 260 (Traxler *et al.*, 2008).

261

262 Lysine starvation is the result of FA starvation, which raises new important questions regarding our  
 263 understanding of RelA function and the stringent response under conditions that are not directly  
 264 linked to amino acid starvation. Apart from FA starvation, glucose starvation and phosphate  
 265 starvation have also been shown to induce a similar higher and rapid ppGpp accumulation in *wt*  
 266 compared to cells lacking RelA, suggesting a much broader role of RelA as perhaps the major  
 267 (p)ppGpp synthetase ([Gentry & Cashel, 1996](#), [Spira et al., 1995](#), [Murray et al., 2003](#)). SpoT has  
 268 been described to sense FA, glucose, phosphate, and iron starvation and can synthesize alarmone in  
 269 cells lacking RelA, but how its activity will be regulated when RelA is present to quickly synthesize  
 270 high amount of (p)ppGpp, will be an important question to address. The paralogous *relA* and *spoT*  
 271 genes are derived from a common ancestor, the bifunctional *rel/rsh* gene by duplication in  
 272 proteobacteria and sequence analysis of SpoT in the Moraxellaceae family of gammaproteobacteria  
 273 suggests that its synthetase activity has been gradually weakened during evolution ([Mittenhuber,](#)  
 274 [2001](#), [Atkinson et al., 2011](#)).

275  
 276 FA biosynthesis in bacteria has been an attractive target for new antibiotics as bacterial FA  
 277 biosynthesis enzymes are structurally different from their eukaryotic analogues. However,  
 278 increasing evidence suggests that high concentration of FA inhibitors induce survival and cross-  
 279 resistance to other antibiotics ([Rodionov & Ishiguro, 1996](#), [Westfall et al., 2019](#), [Kampf, 2018](#),  
 280 [Fahimipour et al., 2018](#)). Many of these inhibitors are being used in products ranging from animal  
 281 feed to personal hygiene products such as hand wash, disinfectants, and get released to the  
 282 environment. Here bacteria will be exposed to sub inhibitory concentrations of the drugs, which can  
 283 have a wide range of consequences. In this study, we report here that exposure to low  
 284 concentrations of FA inhibitors even for a short period of time (5 minutes), is sufficient to induce  
 285 RelA mediated stringent response ([Fig. 1](#)) and provide a 100-fold higher tolerance to cell wall

targeting antibiotics (Fig. 5A to 5C). Recently, RelA dependent antibiotic tolerance was also observed during nitrogen starvation (Brown, 2019). Interestingly, the observation that the antibiotic tolerance induced by FA inhibitors can be completely reversed by supplementing lysine shows therapeutic potential of our study (Fig. 5A to 5C). Interestingly, at high doses of cerulenin (~4X MIC) the cells become highly tolerant to ampicillin lysis independently of *relA*. This effect could be due either to SpoT mediated ppGpp synthesis and/or by complete shutdown of phospholipid biosynthesis, as suggested previously (Rodionov & Ishiguro, 1996).

Taken together, our data robustly show that in *wt* cells, RelA is the dominant ppGpp synthetase under FA starvation by sensing lysine starvation arising because of pyruvate depletion. We propose that other starvation conditions may lead to amino acid starvation in turn raising the possibility that there is a functional segregation such that RelA has become the dominant synthetase and SpoT the only (p)ppGpp hydrolase of *E. coli*. This line of reasoning is supported by the observation that the initial burst of ppGpp synthesis during glucose starvation depends on RelA and is suppressed by the addition of amino acids to the growth medium (Gentry & Cashel, 1996). Our work sheds new light on how the stringent response is triggered and will provide a novel perspective of how to analyze the response under various stress conditions.

## Experimental Procedures

All growth media supplements such as MOPS, glucose, amino acids and other chemicals such as ampicillin, cerulenin, and triclosan were purchased from Sigma.  $\gamma$ -[<sup>32</sup>P]-ATP was obtained from PerkinElmer, USA and [<sup>32</sup>P] phosphoric acid was from Hartmann Analytic, Germany.

## Strains

MG1655 *ΔldcCΔcadA* was created by P1 transduction of *ΔldcC::kan* and *ΔcadA::kan* of the KEIO collection strains ([Baba et al., 2006](#)) into MG1655 to generate MG1655 *ldcC cadA*. After each transduction, the *kan* resistance cassette was removed using the FLP recombinase provided from plasmid pCP20 ([Datsenko & Wanner, 2000](#)). Correct resistance cassette insertion and removal were confirmed by PCR. The resulting strain lacks *ldcC* and *cadA* encoding lysine decarboxylases.

### *Media and growth conditions*

The standard *Escherichia coli* K-12 strain MG1655 (*wt*) strain and its *ΔrelA* derivative were from the lab collection. Cells were routinely streaked from frozen stock onto LB plates and incubated at 37°C overnight for revival. For all experiments, single colonies from the freshly streaked plate were inoculated and grown overnight at 37°C in MOPS minimal media supplemented with 0.2 % glucose, all nucleobases, and 1.32 mM K<sub>2</sub>HPO<sub>4</sub> as described earlier ([Winther et al., 2018](#), [Neidhardt et al., 1974](#)). Culture of *ΔrelA* cells were routinely checked for their growth sensitivity on SMG plates to rule out for the presence of any suppressor mutations.

### *Minimum inhibitory concentration (MIC) calculation*

MIC calculation was according to ([Wiegand et al., 2008](#)). Briefly, overnight inoculates were grown at 37°C in MOPS minimal medium supplemented with 0.2 % glucose and diluted to an OD<sub>600</sub> of ~0.01 and grown to ~0.2 and again diluted to ~0.01. Drugs to be tested (cerulenin and triclosan) were serially diluted into the same MOPS glucose growth medium. A volume of 150 μl of a culture at OD<sub>600</sub> of ~0.01 was mixed with 150 μl serially diluted drug to obtain a final concentration half of the initial concentration of the drug. They were placed in microtitre plates and OD<sub>600</sub> was monitored every 15 minutes with shaking in a BioTek microplate reader for 12-14 hrs. MIC was determined as the lowest concentration at which no growth observed after 12 hrs of incubation.

334

### 335 *Measurement of cellular levels of (p)ppGpp*

336 Estimation of [(p)ppGpp] was done as described previously with a few modifications ([Winther et](#)  
337 [al., 2018](#)). Briefly, overnight inoculates were grown at 37°C in high phosphate (1.32 mM K<sub>2</sub>HPO<sub>4</sub>)  
338 MOPS minimal medium supplemented with 0.2 % glucose (or 0.5 % glycerol as mentioned)  
339 (Neidhardt *et al.*, 1974). Cultures were then diluted to 0.01 OD<sub>600</sub> in low phosphate (0.2 mM  
340 K<sub>2</sub>HPO<sub>4</sub>) MOPS glucose minimal medium and grown till 0.3 OD<sub>600</sub>. At 0.3 OD<sub>600</sub>, they were again  
341 diluted 10-fold in the same growth medium supplemented with <sup>32</sup>P (final specific activity 100  
342 µCi/ml) and grown for 2-3 generations. Fatty acid starvation was induced either by the addition of  
343 cerulenin or triclosan, as mentioned for the individual experiments. Amino acid starvation was  
344 induced by addition of valine (500 µg/ml). Fifty-microliter samples were withdrawn and mixed  
345 with 10 µl of ice-cold 2 M formic acid before and 5, 10, 15, 20 and 30 minutes after starvation.  
346 After two freeze-thaw cycles, samples were centrifuged at 4°C to pellet the cell debris, and 5 µl  
347 aliquots of the supernatants were applied to polyethyleneimine (PEI) cellulose thin layer  
348 chromatography plates (Merck, Sigma), resolved with 1.5 M KH<sub>2</sub>PO<sub>4</sub> (pH 3.4) air dried and  
349 exposed by phosphorimaging (Amersham Typhoon phosphorimager). Quantification was done  
350 using ImageJ and relative abundance of ppGpp and pppGpp was estimated as a percentage value  
351 relative to the total (pppGpp+ppGpp+GTP) amount as described ([Fernandez-Coll & Cashel, 2018](#),  
352 [Mechold et al., 2013](#)).

353

### 354 *Pyruvate quantification assay*

355 Cellular pyruvate level was quantified using Pyruvate Assay Kit (Sigma) according to  
356 manufacturer's protocol. Briefly, cells were grown in balanced growth in MOPS glucose media as  
357 above. Cells were collected before and 10 minutes after treatment with triclosan (1 µg/ml). Cells

were immediately put on ice for 15 minutes and then pelleted down in precooled centrifuge and resuspended in pyruvate assay buffer. Cells were homogenized using glass beads (Sigma) in homogenizer MagNA Lyser (Roche). Centrifuged for 13000 X g for 10 minutes to remove insoluble material. Samples (50  $\mu$ l ) were used for fluorometric pyruvate assay and fluorescence intensity ( $\lambda_{ex}$ =535/ $\lambda_{em}$ =587 nm) was measured as per protocol.

### *Ampicillin tolerance assay*

In order to determine FA starvation dependent survival to ampicillin exposure, single colony of *wt* and *ΔrelA* cells were inoculated for overnight growth at 37 °C in MOPS minimal medium supplemented with 0.2 % glucose as described above ([Neidhardt et al., 1974](#)). The cells were then diluted to an OD<sub>600</sub>-0.01 in the same media and grown till 0.3 OD<sub>600</sub>. To keep cultures in balanced growth, cells were again back-diluted to 0.03 OD<sub>600</sub> and grown till ~0.1 OD<sub>600</sub>. At this point, 0.4 mM lysine was added in one aliquote of *wt* cells and grown for 5-10 minutes. Aliquots of *wt*, *relA* and *wt* (+lysine) were treated with cerulenin (50 or 200  $\mu$ g/ml) or triclosan (1  $\mu$ g/ml) (or valine (500  $\mu$ g/ml) for separate experiments) for 5 minutes and then exposed to ampicillin (100  $\mu$ g/ml) for 3 to 4 hrs while shaking. One aliquot of each culture was directly exposed to ampicillin without being pre-exposed to cerulenin or triclosan (or valine). Untreated samples were collected before ampicillin exposure. After ampicillin exposure, cells were centrifuged, supernatant containing ampicillin was discarded, washed with sterile phosphate-buffered saline (PBS) and cell pellets were resuspended in fresh medium to concentrate five times. Samples were serially diluted and 5  $\mu$ l of each dilution was spotted on LB plates, dried and incubated overnight at 37°C incubator to quantify survivors.

### *tRNA charging levels*

tRNA charging levels were analysed using Northern blotting method as described earlier ([Winther et al., 2018](#)). Briefly, bacterial cultures were grown overnight in MOPS minimal medium supplemented with 0.2% glucose at 37°C. Next morning they are diluted to 0.01 OD<sub>600</sub> and grown till ~0.2 OD<sub>600</sub>. 4mL sample was collected as before starvation and mixed with 4 mL of cold 10% TCA and incubated on ice. Triclosan (1µg/ml) was added into the remaining culture to induce fatty acid starvation. Samples were collected at different time points. For lysine supplementation, similar method was used but 0.4 mM lysine was added 10 minutes before triclosan addition into the culture. tRNAs were isolated, separated by denaturing PAGE, transferred to a Hybond N+ membrane and hybridization were performed using the same protocol as described earlier ([Winther et al., 2018](#)). Lysine tRNA (Lys) and serine tRNA (Ser3) probes were synthesized using published sequences ([Dong et al., 1996](#)).

### Acknowledgements

We thank Michael A. Sørensen and Sine Lo Svenningsen for discussion and suggestions. We would also like to thank Sidsel K. Henriksen for efficient management of lab and making quick availability of reagents and chemicals. This project was funded by grants from the Novo Nordisk Foundation (to K.G) and the Danish National Research Foundation (DNRF 120).

# References

- Arenz, S., Abdelshahid, M., Sohmen, D., Payoe, R., Starosta, A.L., Berninghausen, O., Hauryliuk, V., Beckmann, R., and Wilson, D.N. (2016) The stringent factor RelA adopts an open conformation on the ribosome to stimulate ppGpp synthesis. *Nucleic acids research* **44**: 6471-6481.
- Atkinson, G.C., Tenson, T., and Hauryliuk, V. (2011) The RelA/SpoT homolog (RSH) superfamily: distribution and functional evolution of ppGpp synthetases and hydrolases across the tree of life. *PLoS One* **6**: e23479.
- Baba, T., Ara, T., Hasegawa, M., Takai, Y., Okumura, Y., Baba, M., Datsenko, K.A., Tomita, M., Wanner, B.L., and Mori, H. (2006) Construction of Escherichia coli K-12 in-frame, single-gene knockout mutants: the Keio collection. *Molecular systems biology* **2**: 2006 0008.
- Battesti, A., and Bouveret, E. (2006) Acyl carrier protein/SpoT interaction, the switch linking SpoT-dependent stress response to fatty acid metabolism. *Mol Microbiol* **62**: 1048-1063.
- Battesti, A., and Bouveret, E. (2009) Bacteria possessing two RelA/SpoT-like proteins have evolved a specific stringent response involving the acyl carrier protein-SpoT interaction. *Journal of bacteriology* **191**: 616-624.
- Brown, A., Fernandez, I.S., Gordiyenko, Y., and Ramakrishnan, V. (2016) Ribosome-dependent activation of stringent control. *Nature* **534**: 277-280.
- Cashel, M. (1994) Detection of (p)ppGpp accumulation patterns in Escherichia coli mutants. *Methods in Molecular Genetics* **3**: 341-356.
- Dalebroux, Z.D., Svensson, S.L., Gaynor, E.C., and Swanson, M.S. (2010) ppGpp conjures bacterial virulence. *Microbiol Mol Biol Rev* **74**: 171-199.
- Datsenko, K.A., and Wanner, B.L. (2000) One-step inactivation of chromosomal genes in Escherichia coli K-12 using PCR products. *Proceedings of the National Academy of Sciences of the United States of America* **97**: 6640-6645.
- Davis, M.S., and Cronan, J.E., Jr. (2001) Inhibition of Escherichia coli acetyl coenzyme A carboxylase by acyl-acyl carrier protein. *Journal of bacteriology* **183**: 1499-1503.
- Dong, H., Nilsson, L., and Kurland, C.G. (1996) Co-variation of tRNA abundance and codon usage in Escherichia coli at different growth rates. *J Mol Biol* **260**: 649-663.
- Durfee, T., Hansen, A.M., Zhi, H., Blattner, F.R., and Jin, D.J. (2008) Transcription profiling of the stringent response in Escherichia coli. *Journal of bacteriology* **190**: 1084-1096.
- Fahimipour, A.K., Ben Mamar, S., McFarland, A.G., Blaustein, R.A., Chen, J., Glawe, A.J., Kline, J., Green, J.L., Halden, R.U., Van Den Wymelenberg, K., Huttenhower, C., and Hartmann, E.M. (2018) Antimicrobial Chemicals Associate with Microbial Function and Antibiotic Resistance Indoors. *mSystems* **3**.



- 444 Fernandez-Coll, L., and Cashel, M. (2018) Contributions of SpoT Hydrolase, SpoT Synthetase, and  
445 RelA Synthetase to Carbon Source Diauxic Growth Transitions in Escherichia coli. *Front*  
446 *Microbiol* **9**: 1802.
- 447 Furukawa, H., Tsay, J.T., Jackowski, S., Takamura, Y., and Rock, C.O. (1993) Thiolactomycin  
448 resistance in Escherichia coli is associated with the multidrug resistance efflux pump  
449 encoded by emrAB. *Journal of bacteriology* **175**: 3723-3729.
- 450 Gentry, D.R., and Cashel, M. (1996) Mutational analysis of the Escherichia coli spoT gene  
451 identifies distinct but overlapping regions involved in ppGpp synthesis and degradation. *Mol*  
452 *Microbiol* **19**: 1373-1384.
- 453 Harms, A., Maisonneuve, E., and Gerdes, K. (2016) Mechanisms of bacterial persistence during  
454 stress and antibiotic exposure. *Science* **354**.
- 455 Hauryliuk, V., Atkinson, G.C., Murakami, K.S., Tenson, T., and Gerdes, K. (2015) Recent  
456 functional insights into the role of (p)ppGpp in bacterial physiology. *Nat Rev Microbiol* **13**:  
457 298-309.
- 458 Heath, R.J., and Rock, C.O. (1995) Regulation of malonyl-CoA metabolism by acyl-acyl carrier  
459 protein and beta-ketoacyl-acyl carrier protein synthases in Escherichia coli. *The Journal of*  
460 *biological chemistry* **270**: 15531-15538.
- 461 Heath, R.J., and Rock, C.O. (1999) A missense mutation accounts for the defect in the glycerol-3-  
462 phosphate acyltransferase expressed in the plsB26 mutant. *Journal of bacteriology* **181**:  
463 1944-1946.
- 464 Kampf, G. (2018) Biocidal Agents Used for Disinfection Can Enhance Antibiotic Resistance in  
465 Gram-Negative Species. *Antibiotics (Basel)* **7**.
- 466 Keseler, I.M., Mackie, A., Santos-Zavaleta, A., Billington, R., Bonavides-Martinez, C., Caspi, R.,  
467 Fulcher, C., Gama-Castro, S., Kothari, A., Krummenacker, M., Latendresse, M., Muniz-  
468 Rascado, L., Ong, Q., Paley, S., Peralta-Gil, M., Subhraveti, P., Velazquez-Ramirez, D.A.,  
469 Weaver, D., Collado-Vides, J., Paulsen, I., and Karp, P.D. (2017) The EcoCyc database:  
470 reflecting new knowledge about Escherichia coli K-12. *Nucleic acids research* **45**: D543-  
471 d550.
- 472 Kim, H.Y., Go, J., Lee, K.M., Oh, Y.T., and Yoon, S.S. (2018) Guanosine tetra- and  
473 pentaphosphate increase antibiotic tolerance by reducing reactive oxygen species production  
474 in Vibrio cholerae. *The Journal of biological chemistry* **293**: 5679-5694.
- 475 Kreth, J., Lengeler, J.W., and Jahreis, K. (2013) Characterization of pyruvate uptake in Escherichia  
476 coli K-12. *PLoS One* **8**: e67125.
- 477 Kushwaha, G.S., Bange, G., and Bhavesh, N.S. (2019) Interaction studies on bacterial stringent  
478 response protein RelA with uncharged tRNA provide evidence for its prerequisite complex  
479 for ribosome binding. *Current genetics*.

480 Kusser, W., and Ishiguro, E.E. (1985) Involvement of the relA gene in the autolysis of Escherichia  
481 coli induced by inhibitors of peptidoglycan biosynthesis. *Journal of bacteriology* **164**: 861-  
482 865.

483 Laber, B., Gomis-Ruth, F.X., Romao, M.J., and Huber, R. (1992) Escherichia coli  
484 dihydrodipicolinate synthase. Identification of the active site and crystallization. *Biochem J*  
485 **288 ( Pt 2)**: 691-695.

486 Leavitt, R.I., and Umbarger, H.E. (1962) Isoleucine and valine metabolism in Escherichia coli. XI.  
487 Valine inhibition of the growth of Escherichia coli strain K-12. *Journal of bacteriology* **83**:  
488 624-630.

489 Loveland, A.B., Bah, E., Madireddy, R., Zhang, Y., Brilot, A.F., Grigorieff, N., and Korostelev,  
490 A.A. (2016) Ribosome\*RelA structures reveal the mechanism of stringent response  
491 activation. *eLife* **5**.

492 Mechold, U., Potrykus, K., Murphy, H., Murakami, K.S., and Cashel, M. (2013) Differential  
493 regulation by ppGpp versus pppGpp in Escherichia coli. *Nucleic acids research* **41**: 6175-  
494 6189.

495 Mittenhuber, G. (2001) Comparative genomics and evolution of genes encoding bacterial (p)ppGpp  
496 synthetases/hydrolases (the Rel, RelA and SpoT proteins). *J Mol Microbiol Biotechnol* **3**:  
497 585-600.

498 Murray, H.D., Schneider, D.A., and Gourse, R.L. (2003) Control of rRNA expression by small  
499 molecules is dynamic and nonredundant. *Molecular cell* **12**: 125-134.

500 Neidhardt, F.C., Bloch, P.L., and Smith, D.F. (1974) Culture medium for enterobacteria. *Journal of*  
501 *bacteriology* **119**: 736-747.

502 Parsons, J.B., and Rock, C.O. (2013) Bacterial lipids: metabolism and membrane homeostasis. *Prog*  
503 *Lipid Res* **52**: 249-276.

504 Potrykus, K., and Cashel, M. (2008) (p)ppGpp: still magical? *Annu Rev Microbiol* **62**: 35-51.

505 Potrykus, K., Murphy, H., Philippe, N., and Cashel, M. (2011) ppGpp is the major source of growth  
506 rate control in E. coli. *Environ Microbiol* **13**: 563-575.

507 Reitzer, L. (2005) Catabolism of Amino Acids and Related Compounds. *EcoSal Plus* **1**.

508 Rodionov, D.G., and Ishiguro, E.E. (1995) Direct correlation between overproduction of guanosine  
509 3',5'-bispyrophosphate (ppGpp) and penicillin tolerance in Escherichia coli. *Journal of*  
510 *bacteriology* **177**: 4224-4229.

511 Rodionov, D.G., and Ishiguro, E.E. (1996) Dependence of peptidoglycan metabolism on  
512 phospholipid synthesis during growth of Escherichia coli. *Microbiology* **142 ( Pt 10)**: 2871-  
513 2877.

514 Rojas, A.M., Ehrenberg, M., Andersson, S.G., and Kurland, C.G. (1984) ppGpp inhibition of  
515 elongation factors Tu, G and Ts during polypeptide synthesis. *Molecular & general genetics*  
516 : *MGG* **197**: 36-45.

517 Ronneau, S., and Hallez, R. (2019) Make and break the alarmone: regulation of (p)ppGpp  
518 synthetase/hydrolase enzymes in bacteria. *FEMS microbiology reviews*.

519 Sanchez-Vazquez, P., Dewey, C.N., Kitten, N., Ross, W., and Gourse, R.L. (2019) Genome-wide  
520 effects on Escherichia coli transcription from ppGpp binding to its two sites on RNA  
521 polymerase. *Proceedings of the National Academy of Sciences of the United States of*  
522 *America* **116**: 8310-8319.

523 Seyfzadeh, M., Keener, J., and Nomura, M. (1993) spoT-dependent accumulation of guanosine  
524 tetraphosphate in response to fatty acid starvation in Escherichia coli. *Proceedings of the*  
525 *National Academy of Sciences of the United States of America* **90**: 11004-11008.

526 Spira, B., Silberstein, N., and Yagil, E. (1995) Guanosine 3',5'-bispyrophosphate (ppGpp) synthesis  
527 in cells of Escherichia coli starved for Pi. *Journal of bacteriology* **177**: 4053-4058.

528 Svitil, A.L., Cashel, M., and Zyskind, J.W. (1993) Guanosine tetraphosphate inhibits protein  
529 synthesis in vivo. A possible protective mechanism for starvation stress in Escherichia coli.  
530 *The Journal of biological chemistry* **268**: 2307-2311.

531 Traxler, M.F., Summers, S.M., Nguyen, H.T., Zacharia, V.M., Hightower, G.A., Smith, J.T., and  
532 Conway, T. (2008) The global, ppGpp-mediated stringent response to amino acid starvation  
533 in Escherichia coli. *Mol Microbiol* **68**: 1128-1148.

534 Vinella, D., Albrecht, C., Cashel, M., and D'Ari, R. (2005) Iron limitation induces SpoT-dependent  
535 accumulation of ppGpp in Escherichia coli. *Mol Microbiol* **56**: 958-970.

536 Wang, J., Tian, Y., Zhou, Z., Zhang, L., Zhang, W., Lin, M., and Chen, M. (2016) Identification  
537 and Functional Analysis of RelA/SpoT Homolog (RSH) Genes in Deinococcus radiodurans.  
538 *Journal of microbiology and biotechnology* **26**: 2106-2115.

539 Westfall, C., Flores-Mireles, A.L., Robinson, J.I., Lynch, A.J.L., Hultgren, S., Henderson, J.P., and  
540 Levin, P.A. (2019) The widely used antimicrobial triclosan induces high levels of antibiotic  
541 tolerance in vitro and reduces antibiotic efficacy up to 100-fold in vivo. *Antimicrob Agents*  
542 *Chemother*.

543 Wiegand, I., Hilpert, K., and Hancock, R.E. (2008) Agar and broth dilution methods to determine  
544 the minimal inhibitory concentration (MIC) of antimicrobial substances. *Nat Protoc* **3**: 163-  
545 175.

546 Winther, K.S., Roghanian, M., and Gerdes, K. (2018) Activation of the Stringent Response by  
547 Loading of RelA-tRNA Complexes at the Ribosomal A-Site. *Mol Cell* **70**: 95-105.e104.

548 Xiao, H., Kalman, M., Ikehara, K., Zemel, S., Glaser, G., and Cashel, M. (1991) Residual guanosine  
549 3',5'-bispyrophosphate synthetic activity of relA null mutants can be eliminated by spoT null  
550 mutations. *The Journal of biological chemistry* **266**: 5980-5990.

551

552

## 553 **FIGURE LEGENDS**

### 554 **Figure 1. RelA is the major (p)ppGpp synthetase during fatty acid starvation.**

555 (A) Schematic representation of FA biosynthesis in *E. coli*. Acetyl-CoA is the basic unit for FA  
556 synthesis and is synthesized either from pyruvate by pyruvate dehydrogenase or generated by  $\beta$ -  
557 oxidation of FA. The first committed step in FA synthesis is catalyzed by the multi-subunit enzyme  
558 complex acetyl-CoA carboxylase (ACC) by carboxylation of acetyl-CoA to malonyl-CoA. The  
559 malonyl group is then transferred to acyl carrier protein (ACP) by FabD to form malonyl-ACP. The  
560 initial condensation reaction is performed by FabH that catalyzes the condensation of malonyl-ACP  
561 and acetyl-CoA to form the 4-C compound acetoacetyl-ACP. The acetoacetyl-ACP is substrate of  
562 cyclic reactions performed by FabG, FabA/FabZ and FabI to make 4-C acyl-ACP. FabB/FabF  
563 catalyse chain elongation by condensation of 4-C acyl-ACP with a new molecule of malonyl-ACP  
564 thereby increasing the chain length by 2-C in each cycle. As indicated, cerulenin and triclosan  
565 inhibit FA chain elongation by inhibiting FabB/FabF and FabI, respectively.

566 (B) Kinetics of (p)ppGpp accumulation in MG1655 (*wt*) and  $\Delta relA$  strains after the addition of  
567 cerulenin (200  $\mu$ g/ml) revealed by TLC and radiolabeling with  $^{32}$ P as described in *Experimental*  
568 *Procedures* according to the protocol kindly provided by Mike Cashel ([Cashel, 1994](#)) with a few  
569 modifications ([Winther et al., 2018](#)). Positions of GTP, ppGpp and pppGpp are indicated. Cells  
570 were grown in MOPS media supplemented with 0.2 % glucose at 37°.

571 (C) Quantification of (p)ppGpp accumulation in *wt* and  $\Delta relA$  cells. Quantification was done as  
572 described in *Experimental Procedures*. Data collected from 4-5 separate experiments were used to  
573 calculate mean with standard deviations. MIC for both *wt* and  $\Delta relA$  cells were found to be close to  
574 ~64  $\mu$ g/ml for cerulenin and no growth observed after 24 hrs of incubation (Fig. S1A). Initially, we  
575 used 200  $\mu$ g/ml cerulenin (~4X MIC) to inhibit FA synthesis for (p)ppGpp measurements. This  
576 concentration was also used in previous studies ([Battesti & Bouveret, 2006](#), [Seyfzadeh et al., 1993](#)).

577

578 **Figure 2. Exogenous lysine suppresses activation of RelA during fatty acid starvation.**

579 (A) Deconvolution of aa depletion by supplementing the MOPS glucose media at 37° with aa  
 580 mixtures 10 minutes before the addition of cerulenin (200 µg/ml). MixA: alanine, arginine,  
 581 asparagine, aspartate, glutamate, glutamine, glycine, histidine, serine and lysine); MixB (isoleucine,  
 582 proline, tyrosine, threonine, tryptophan, valine, leucine, cysteine, methionine and phenylalanine).  
 583 Final aa concentrations were as recommended ([Neidhardt et al., 1974](#)).  
 584 (B) MixA was subdivided into 3 sub-mixes: MixX (alanine, arginine, asparagine), MixY (aspartate,  
 585 glutamate, glutamine) and MixZ (glycine, histidine, serine and lysine). These mixtures were  
 586 supplemented separately into different *wt* cultures and then the (p)ppGpp levels were measured  
 587 before and after the addition of cerulenin (200 µg/ml).  
 588 (C) and (D) Quantification of (p)ppGpp accumulation in *wt*,  $\Delta relA$  and *wt* (+lys; supplementation  
 589 with 0.4 mM lysine) upon high (200 µg/ml) or low (50 µg/ml) cerulenin concentration,  
 590 respectively. The quantifications shown were derived from at least three different experiments as  
 591 mean values with standard deviations, and primary data were obtained as described in the Legend to  
 592 **Fig. 1B**.

593

594 **Figure 3. Lysine curtails accumulation of uncharged tRNA<sup>lys</sup> after fatty acid starvation**

595 (A) Charging levels of tRNA<sup>lys</sup> before and after the addition of triclosan (1 µg/ml). Total RNA was  
 596 separated on PAGE, processed for Northern blotting analysis and hybridized with a probe specific  
 597 for tRNA<sup>lys</sup> (*Experimental Procedures*). Representative image shown here. Percentage (%) of  
 598 uncharged tRNA was quantified according to the signal intensity of  
 599 uncharged/(charged+uncharged). One culture was supplemented with lysine before triclosan  
 600 addition. A fraction of tRNA was deacylated *in vitro* by base treatment (100 mM Tris-HCl [pH-9])

601 for control (C<sub>2</sub>) and indicates the position of uncharged tRNA<sup>lys</sup>. C<sub>1</sub>- Charged tRNA control. **(B)**

602 The filter from (A) was stripped and hybridized with a tRNA<sup>ser</sup> specific probe.

603

#### 604 **Figure 4. Pyruvate reduces accumulation of (p)ppGpp**

605 **(A)** Schematic of the lysine biosynthesis pathway with relevant intermediates. Lysine is synthesized  
606 from aspartate in nine reactions. The initial two steps are common to lysine, methionine and  
607 threonine biosynthesis. The first unique and rate limiting step is catalyzed by DapA, which uses  
608 aspartate-4 semialdehyde and pyruvate to synthesize 4-hydroxy-tetrahydronicotinate.

609 **(B)** Quantification of (p)ppGpp measurement of MG1655 (*wt*) cells, grown in MOPS + glycerol  
610 (0.5 %) medium at 37°C, supplemented with the 2% of pyruvate added before cerulenin (200  
611 µg/ml) treatment.

612 **(C)** Quantification of cellular levels of pyruvate before and after triclosan (Tri; 1 µg/ml) treatment.  
613 Data presented here are the mean values from three different experiments.

614

#### 615 **Figure 5. Fatty acid starvation induces ampicillin tolerance**

616 **(A)** Cells of MG1655 (*wt*) and  $\Delta relA$  strains growing balanced in MOPS + 0.2 % glucose media at  
617 37°C were either left untreated, directly exposed to ampicillin (100 µg/ml) for 3 hrs or first treated  
618 with triclosan (1 µg/ml ~MIC) for 5 minutes and then exposed to ampicillin. In another culture of *wt*  
619 cells, 0.4 mM lysine was added.

620 **(B)** Averages of colony forming units (CFU) from four different experiments, performed in a same  
621 way as in (A) but treated instead with cerulenin (50 µg/ml). Mean and standard deviations are  
622 shown.

623 **(C)** Effect of valine. Experiments were accomplished as in (B) except that the stringent response  
624 was induced by the addition of valine (500 µg/ml). Quantification from three experiments are



shown here. Abbreviations: T, Triclosan (1 µg/ml); C(50), Cerulenin (50 µg/ml); Val(500), Valine (500 µg/ml).

# **Figure 6. Model of RelA activation during fatty acid starvation**

During exponential growth, acetyl-CoA is synthesized and used in FA biosynthesis with strict regulation as generation of long-chain fatty acids will fine-tune the activity of acetyl-CoA carboxylase (ACC) by feed-back inhibition. This and other possible regulation mechanisms maintain very high concentration of acetyl-CoA in the cell. Acetyl-CoA is synthesized from pyruvate by the pyruvate dehydrogenase complex. Pyruvate is the resulting product of glycolysis. Pyruvate itself is required for biosynthesis of many amino acids such as lysine (shown here and in Fig. 4A), valine and isoleucine (Fig. S6C). Upon inhibition of FA biosynthesis (shown here either by cerulenin or triclosan), FA chain elongation will be blocked and long-chain FA amount drops. Low level of long-chain FA relieves the regulation of ACC causing the uninhibited reaction to proceed to consume acetyl-CoA and accumulate malonyl-CoA. We propose that this sudden change drives high rate of acetyl-CoA synthesis from pyruvate causing unavailability of pyruvate for lysine biosynthesis. Inhibition of lysine biosynthesis will deplete lysine pool and hence uncharged tRNA<sup>lys</sup> levels will accumulate. RelA binds to these uncharged tRNA and vacant A-site on ribosome to synthesize ppGpp. High ppGpp levels shut down cell wall synthesis resulting in ampicillin tolerance. Red color shows the consequences of FA starvation; Thick arrow shows enhanced activity of enzyme/ accumulation of products; dotted arrow shows reduced activity of enzyme/depletion of products.



647

## 648 **Supporting information**

649

## 650 **Legends to the supplementary figures**

651

### 652 **Figure S1. Minimum inhibitory concentration of cerulenin and triclosan for *wt* and $\Delta relA$ cells**

653 **(A)** MIC of cerulenin was calculated for *wt* and  $\Delta relA$  as described in materials and methods. At 64

654  $\mu\text{g/ml}$  final concentration of cerulenin no growth was observed in *wt* and in  $\Delta relA$  cells therefore

655  $64\mu\text{g/ml}$  was considered as MIC value for both the strains.

656 **(B)** MIC of triclosan was calculated for *wt* and  $\Delta relA$  as described in materials and methods. At 1

657  $\mu\text{g/ml}$  final concentration of triclosan little growth was observed either in *wt* or in  $\Delta relA$  cells

658 therefore  $1\mu\text{g/ml}$  was considered as MIC value of triclosan for both the strains. MIC for both *wt* and

659  $\Delta relA$  cells was found to be close to  $\sim 1\mu\text{g/ml}$  for triclosan were no growth observed after 24 hrs of

660 incubation in MOPS glucose medium (**Fig. S1B**).

661

### 662 **Figure S2. Effect of amino acid mixture supplementation on stringent response during fatty**

#### 663 **acid (FA) starvation**

664 **(A)** Representative autoradiogram of a TLC showing the time dependent (p)ppGpp accumulation

665 upon cerulenin ( $200\mu\text{g/ml}$ ) treatment in *wt* cells either without or pretreated with mixture of 10

666 amino acids each in MixA and in MixB. MixA (alanine, arginine, asparagine, aspartate, glutamate,

667 glutamine, glycine, histidine, serine and lysine) and MixB (isoleucine, proline, tyrosine, threonine,

668 tryptophan, valine, leucine, cysteine, methionine and phenylalanine)

669 **(B)** As in A but cultures were pretreated with mixture of amino acids from MixX, MixY or MixZ.  
 670 MixX (alanine, arginine, asparagine), MixY (aspartate, glutamate, glutamine) and MixZ (glycine,  
 671 histidine, serine and lysine).  
 672 **(C)** As in A, but cultures were pretreated with single amino acids glycine, histidine, serine or lysine.  
 673 All amino acids were used at final concentration as recommended ([Neidhardt et al., 1974](#)).  
 674 Positions of GTP, ppGpp and pppGpp are indicated. Time points above TLC images are in minutes  
 675 after cerulenin treatment.

676 **(D)** Representative TLC showing the time dependent (p)ppGpp accumulation upon cerulenin  
 677 (200 µg/ml) treatment in *wt*, *ΔrelA* or *wt* (supplemented with 0.4 mM lysine).  
 678

### 679 **Figure S3. Lysine supplementation also reduces stringent response during triclosan treatment**

680 **(A)** Representative TLC image showing the time dependent (p)ppGpp accumulation upon triclosan  
 681 (1 µg/ml) treatment in *wt*, *ΔrelA* and *wt* (supplemented with 0.4 mM lysine).

682 **(B)** Quantification of (p)ppGpp accumulation in *wt*, *ΔrelA* and *wt* (supplemented with 0.4 mM  
 683 lysine) upon triclosan (1 µg/ml) treatment. Data collected from three different experiments were  
 684 used to calculate mean with standard deviation.  
 685

### 686 **Figure S4. tRNA acylation levels of *wt* and *ΔrelA* cells before and after triclosan (1µg/ml)** 687 **treatment**

688 Total tRNA isolated from *wt* **(A)** or *ΔrelA* **(C)** cells before and 5, 10, 15 minutes after triclosan  
 689 (1µg/ml) treatment and processed for Northern blotting analysis using an probe specific to  
 690 tRNA<sup>Ala</sup>. Percentage (%) of uncharged RNA was quantified according to signal intensity of  
 691 uncharged/(charged+uncharged). A fraction of tRNA was deacylated in-vitro by base  
 692 treatment (100 mM Tris-HCl [pH-9]) for control. Positions of charged (C1) and uncharged (C2)

693 controls are shown. **(B) & (D)** Blots in (A) & (C) are hybridized with tRNA<sup>Ser</sup>  
694 specific probe respectively.

695 **Figure S5. Lysine decarboxylase mutant does not affect the stringent response after fatty acid**  
696 **starvation**

697 Representative TLC image showing the time dependent (p)ppGpp accumulation upon cerulenin  
698 (200 µg/ml) treatment in *wt*, *ΔrelA* and in *ΔldcC ΔcadA* mutant. The positions of GTP, ppGpp and  
699 pppGpp are indicated. Time-points above TLCs are in minutes after cerulenin treatment. Levels of  
700 (p)ppGpp were measured as described in the Legend to Fig. 1.

701  
702 **Figure S6. Effect of pyruvate supplementation on stringent response**

703 **(A)** (p)ppGpp accumulation upon cerulenin (200 µg/ml) treatment in *wt* with and without  
704 pretreatment with 2% pyruvate. Levels of (p)ppGpp were measured as described in the Legend to  
705 Fig. 1.

706 **(B)** Representative TLC image showing the time dependent (p)ppGpp accumulation upon valine  
707 (500 µg/ml) treatment in *wt* (untreated) and when pretreated with 2% pyruvate. Positions of GTP,  
708 ppGpp and pppGpp are indicated. Time points above TLC images are in minutes after cerulenin or  
709 valine treatment. Levels of (p)ppGpp were measured as described in the Legend to Fig. 1.

710 **(C)** Schematic representation of valine and isoleucine biosynthesis pathways in *E. coli* K-12  
711 ([Keseler et al., 2017](#)). Excess valine inhibits enzymes that use pyruvate as one of the substrates  
712 (shown in red). Pyruvate supplementation has previously been shown to relax this inhibition in a  
713 competitive manner ([Leavitt & Umbarger, 1962](#)).

714  
715 **Figure S7. Fatty acid starvation increases tolerance to ampicillin**

716 **(A)** *wt* and  $\Delta relA$  cells growing balanced in MOPS + 0.2 % glucose media were either left  
 717 untreated, directly exposed to ampicillin (100  $\mu$ g/ml) for 3 hrs or first treated with cerulenin (either  
 718 50 or 200  $\mu$ g/ml) for 5 minutes and then exposed to ampicillin. In another culture of the *wt* strain,  
 719 0.4 mM lysine was added and then processed in the same way to analyse the effect of lysine on  
 720 ampicillin tolerance.

721 **(B)** Colony forming units (CFU) from four different experiments, performed as in A. Means and  
 722 standard deviations are indicated.

723 **(C)** Cells of *wt* and  $\Delta relA$  strains growing balanced in MOPS + 0.2 % glucose medium measured in  
 724 a plate reader up to OD<sub>600</sub> ~0.2 and then cerulenin was added (50 or 200  $\mu$ g/ml). Arrow indicates  
 725 addition of cerulenin. Growth rate was monitored at 15' intervals for 12-14 hrs. Data points are  
 726 averages of four experiments.

727

728

A

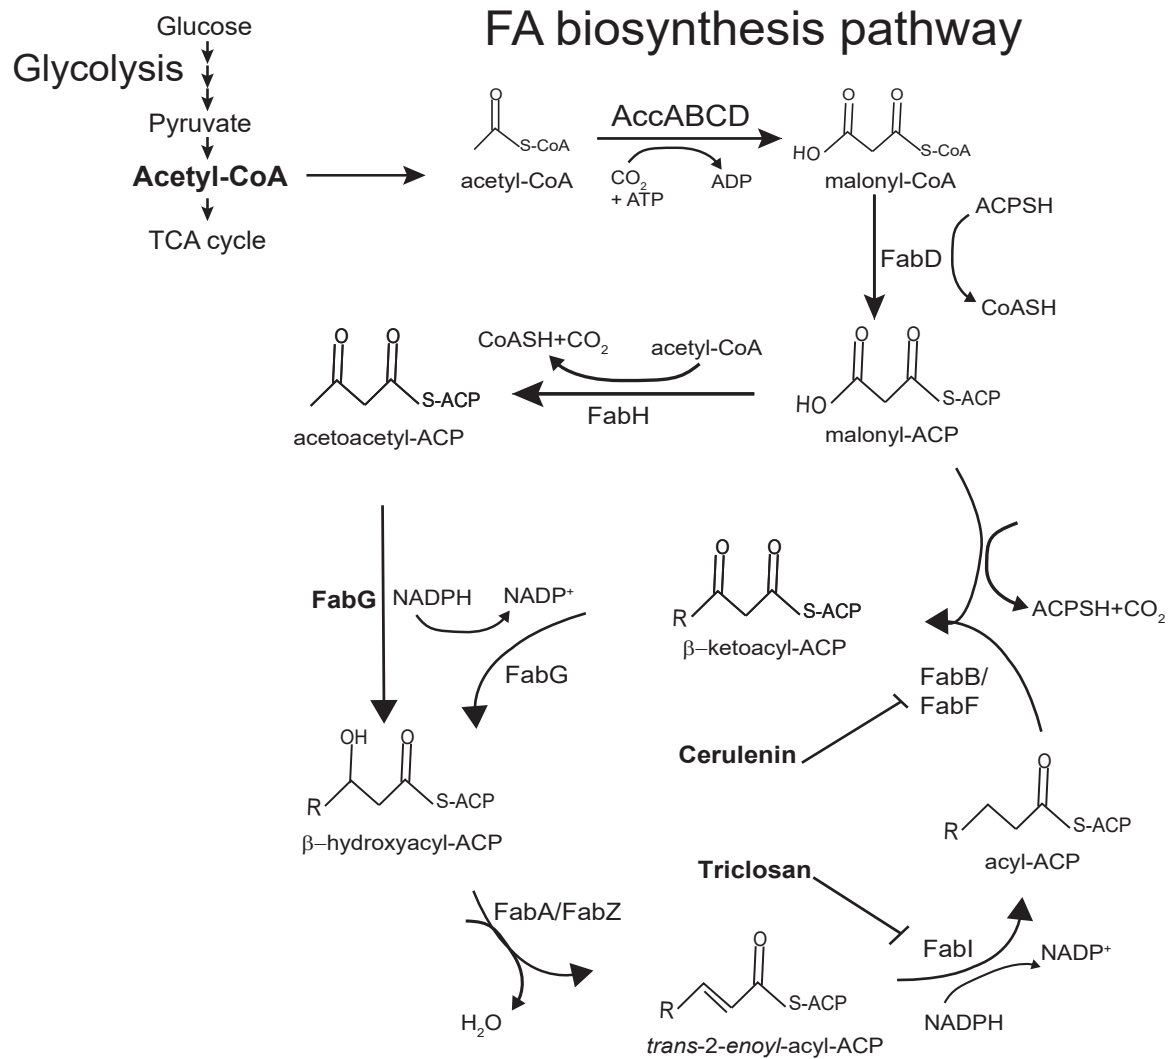

B

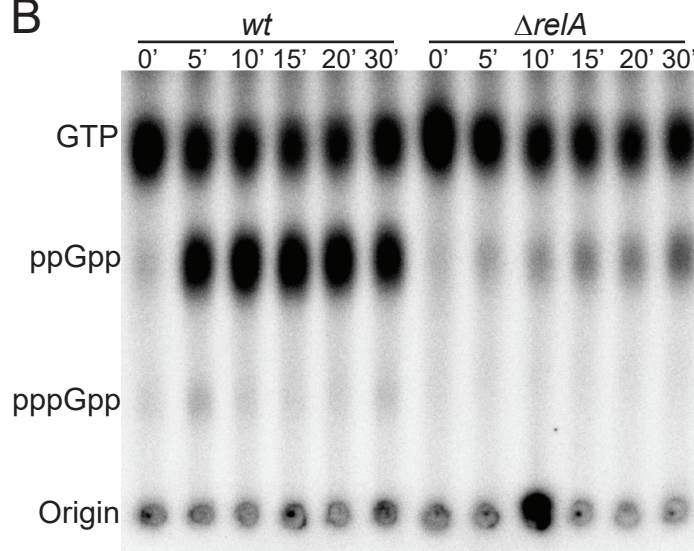

C

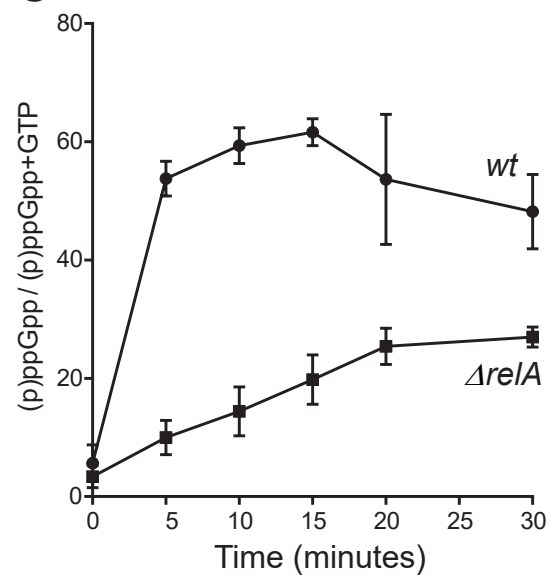

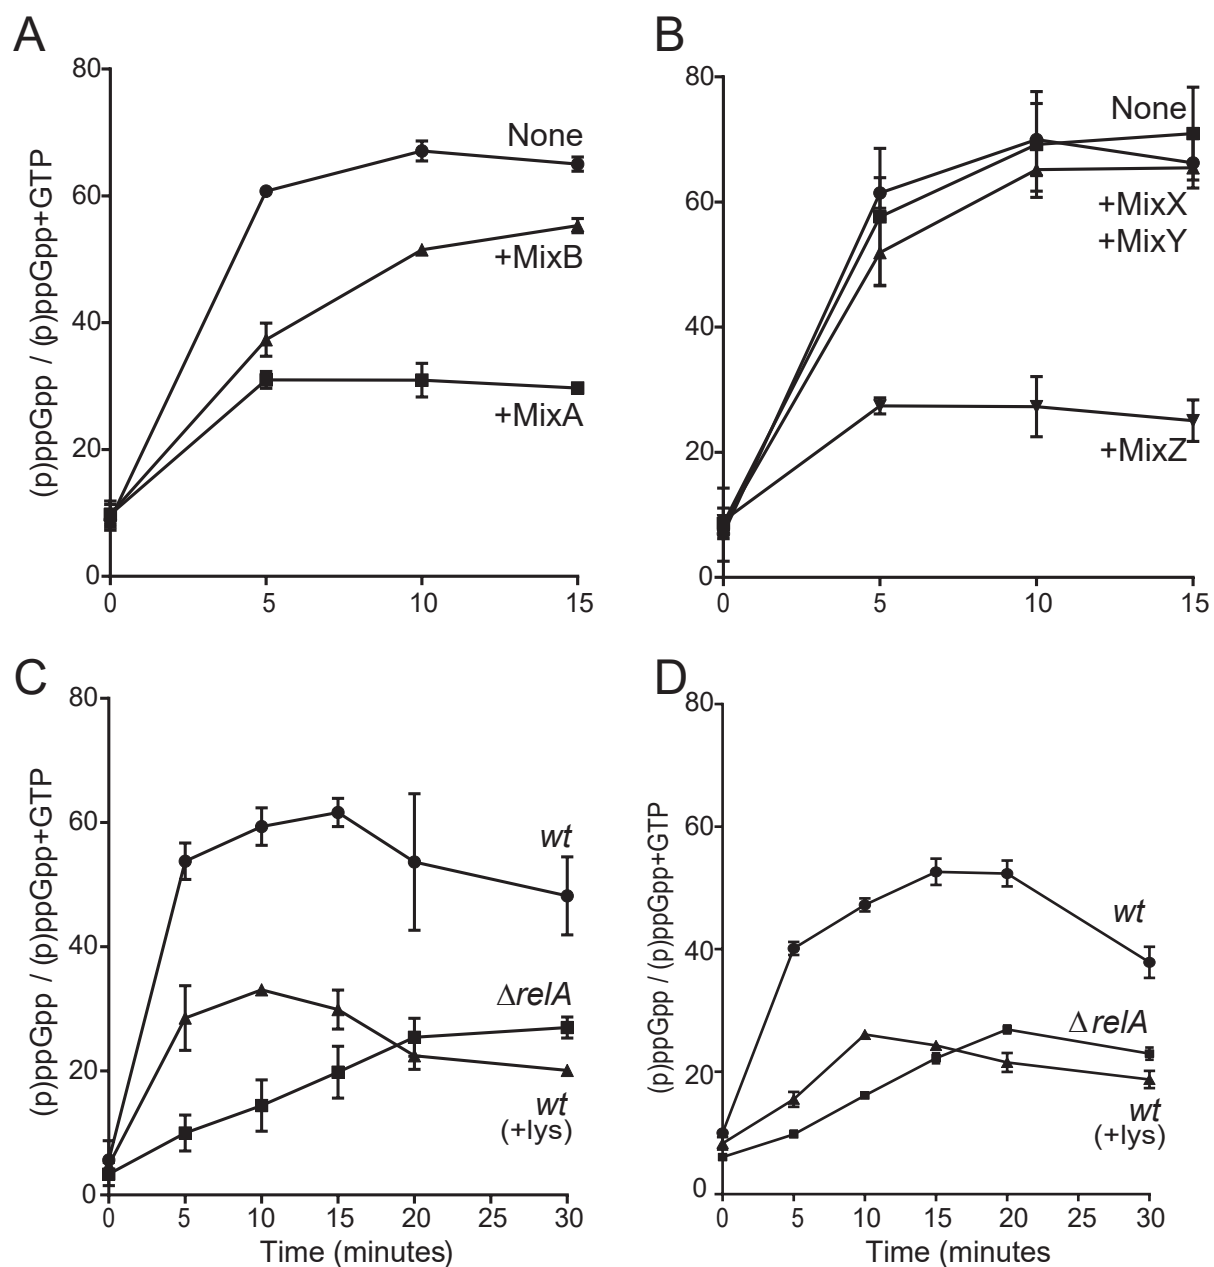

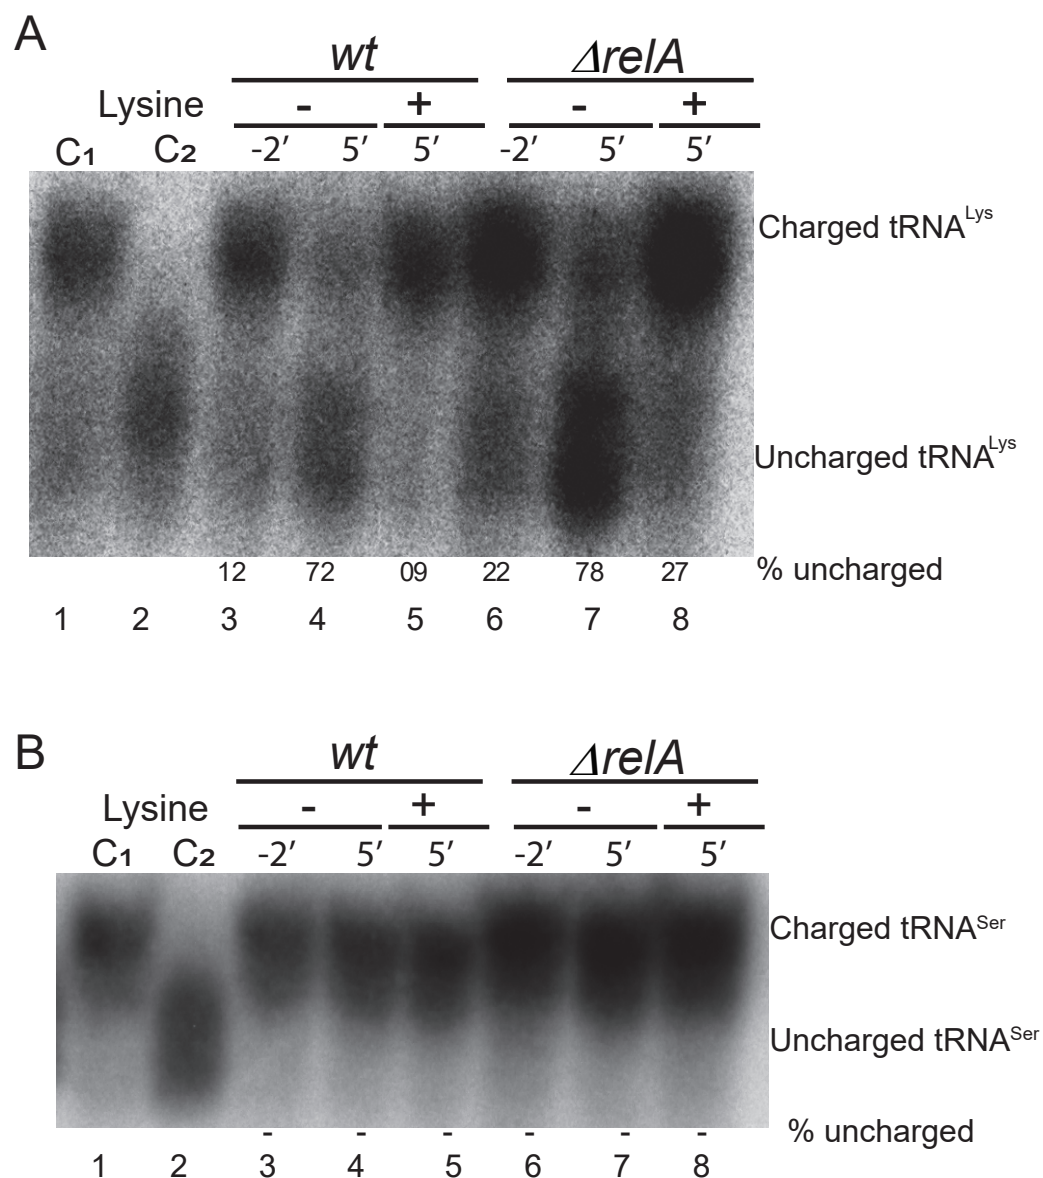

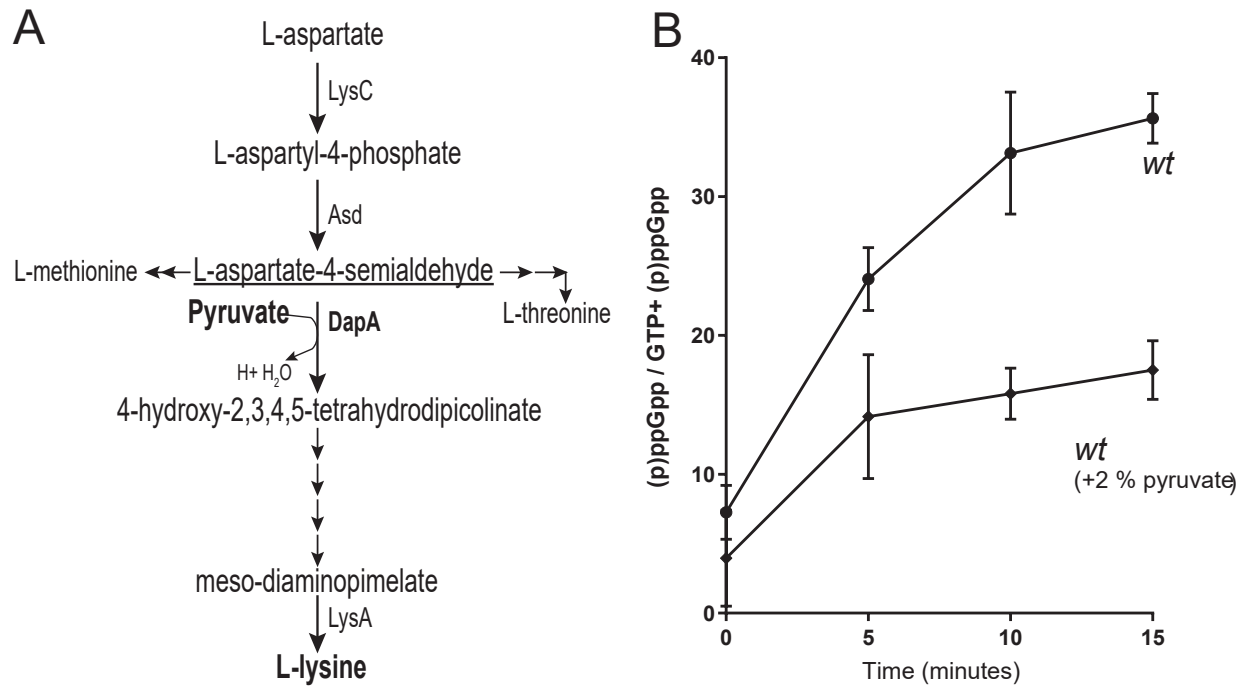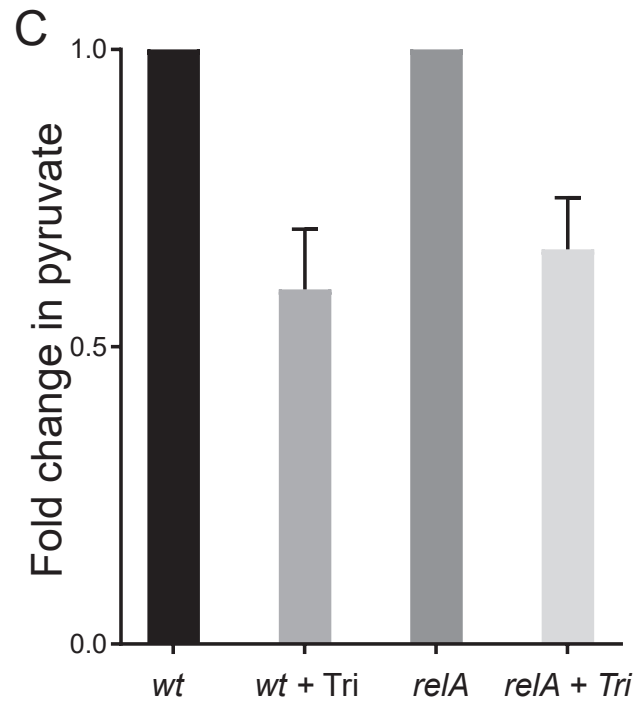



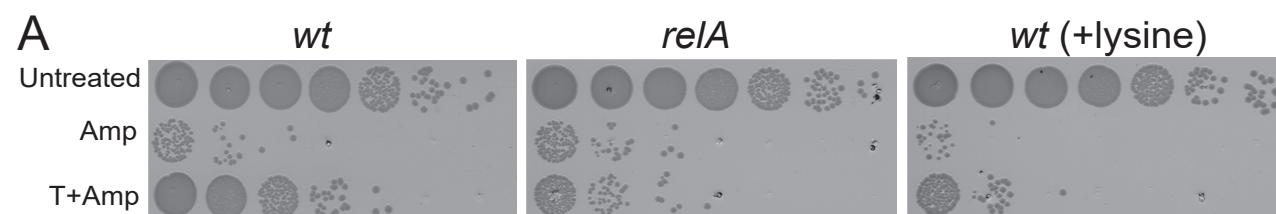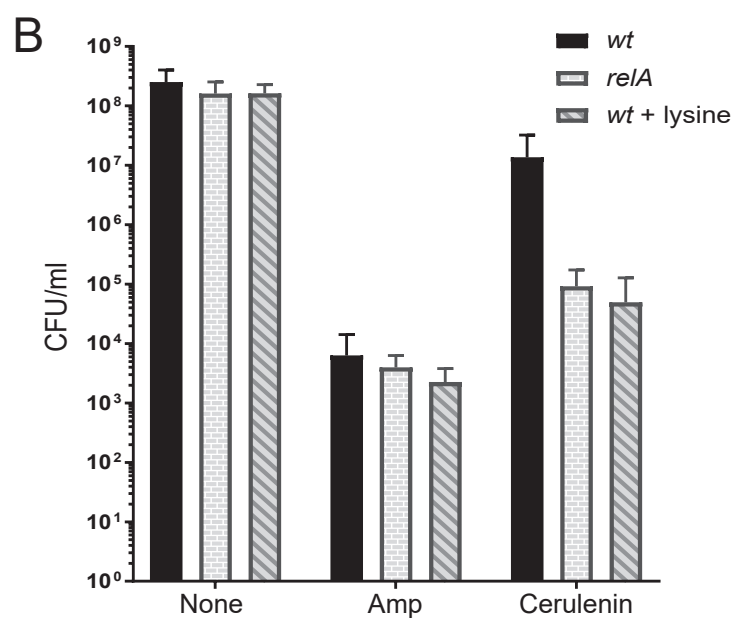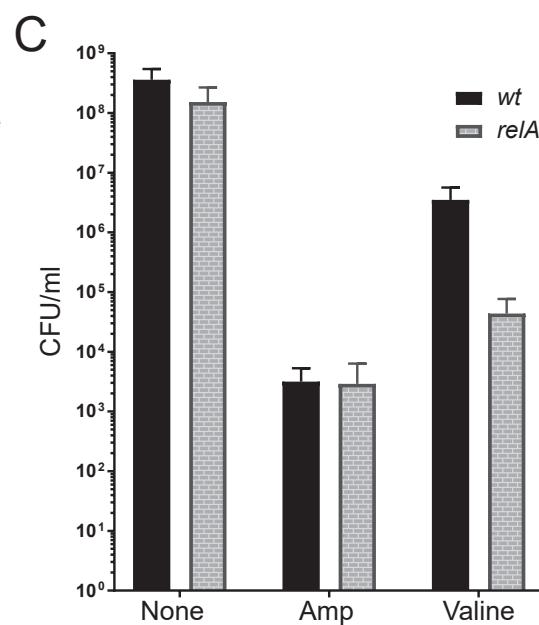

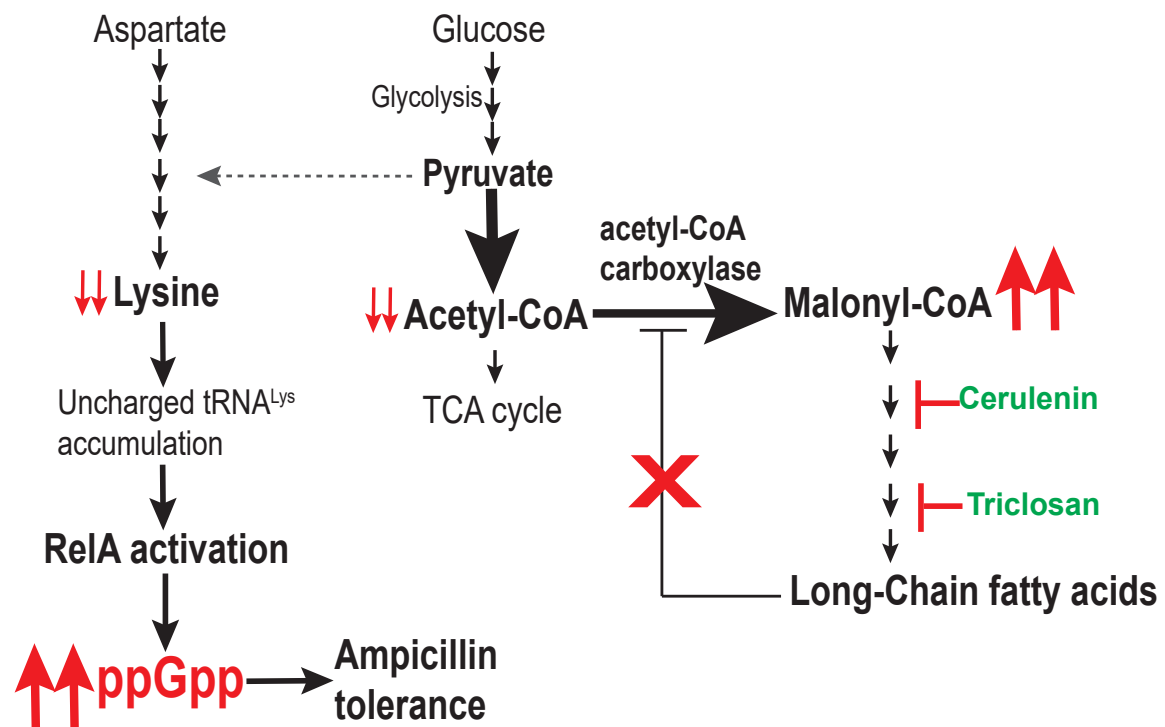

## Supplementary Information

# Fatty acid starvation activates RelA by depleting lysine precursor pyruvate

Anurag Kumar Sinha<sup>1\*</sup>, Kristoffer Skovbo Winther<sup>1</sup>, Mohammad Roghanian<sup>2</sup> and Kenn Gerdes<sup>1\*</sup>

<sup>1</sup>Centre of Excellence for Bacterial Stress Response and Persistence,

Department of Biology,

University of Copenhagen,

Ole Maaløes Vej 5,

2200 Copenhagen N,

Denmark

<sup>2</sup>Department of Molecular Biology,

Umeå University,

901 87 Umeå,

Sweden

**Running title:** Fatty acid starvation activates (p)ppGpp synthetase I

\*Corresponding authors: [anurag.sinha@bio.ku.dk](mailto:anurag.sinha@bio.ku.dk), [kgerdes@bio.ku.dk](mailto:kgerdes@bio.ku.dk)

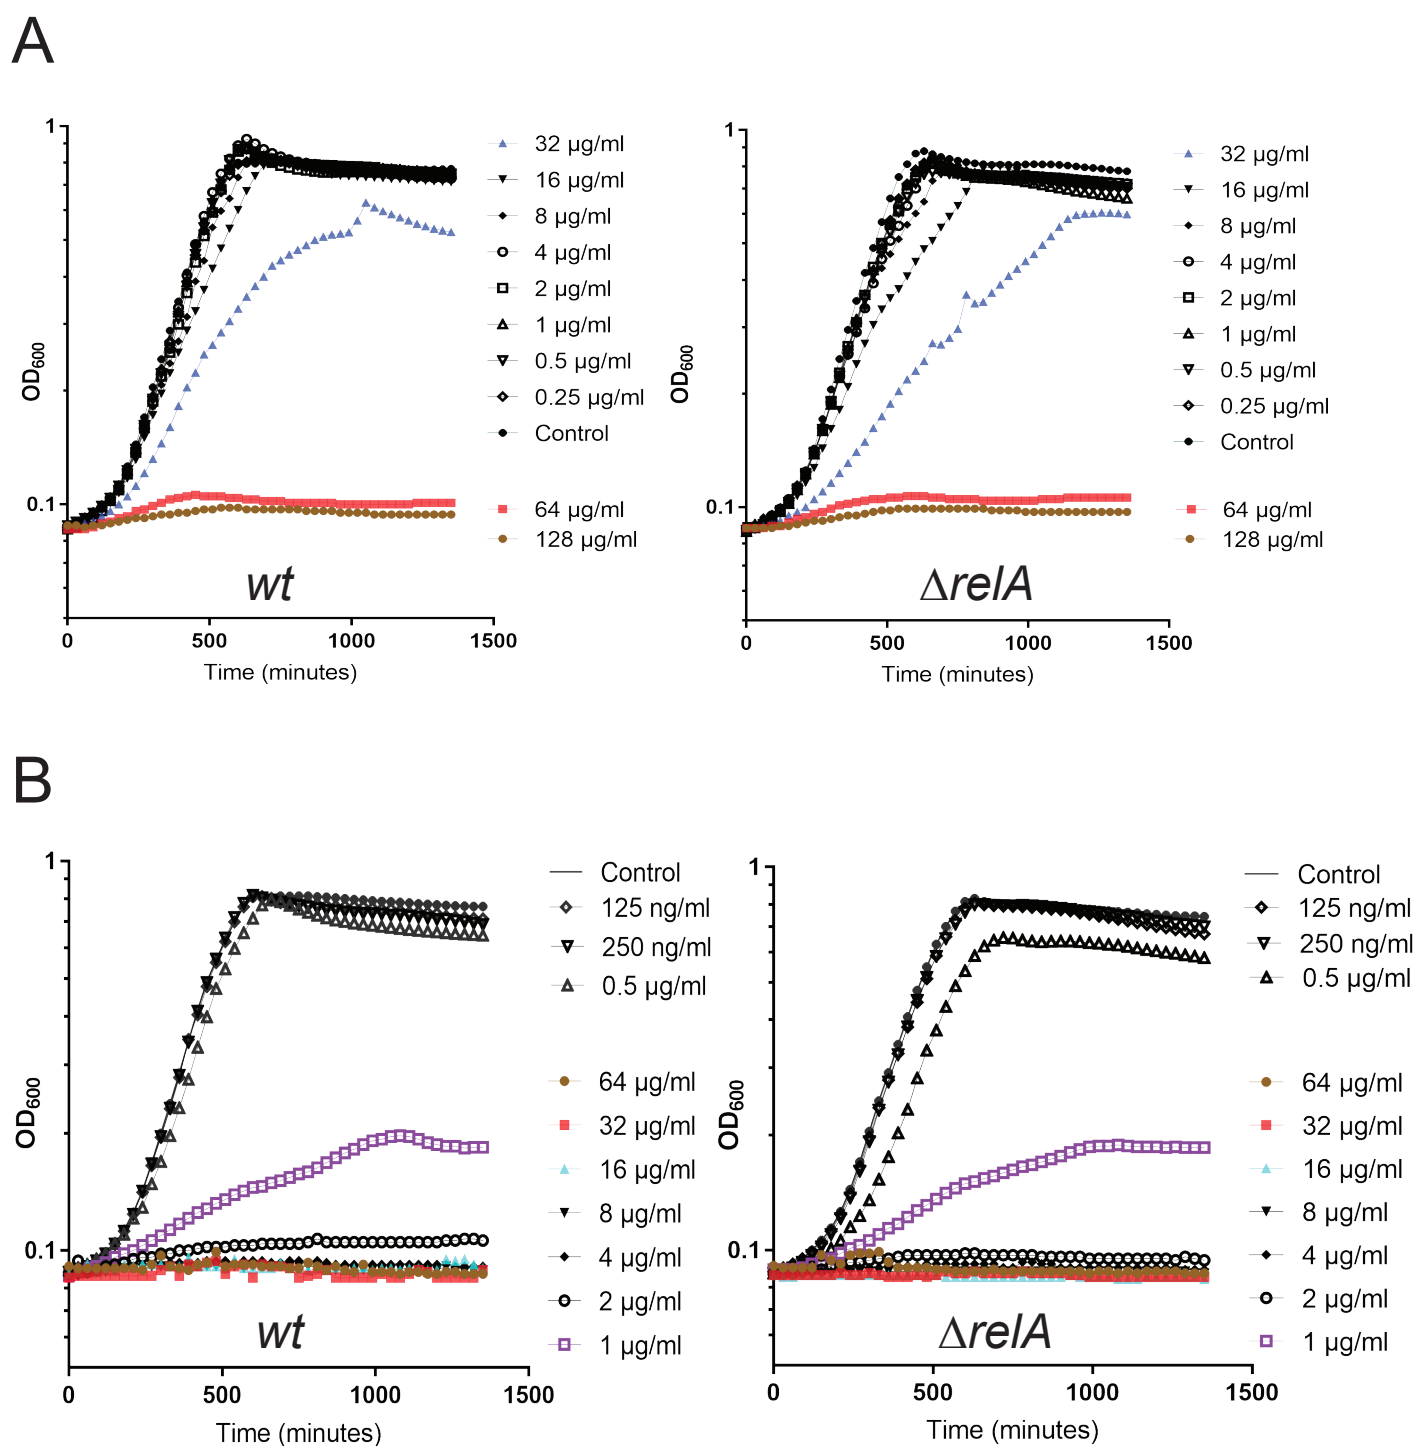

**Figure S1. Minimum inhibitory concentration of cerulenin and triclosan for *wt* and  $\Delta relA$  cells**

**(A)** MIC of cerulenin was calculated for *wt* and  $\Delta relA$  as described in materials and methods. At 64  $\mu\text{g/ml}$  final concentration of cerulenin no growth was observed in *wt* and in  $\Delta relA$  cells therefore 64 $\mu\text{g/ml}$  was considered as MIC value for both the strains.

**(B)** MIC of triclosan was calculated for *wt* and  $\Delta relA$  as described in materials and methods. At 1  $\mu\text{g/ml}$  final concentration of triclosan little growth was observed either in *wt* or in  $\Delta relA$  cells therefore 1 $\mu\text{g/ml}$  was considered as MIC value of triclosan for both the strains. MIC for both *wt* and  $\Delta relA$  cells was found to be close to ~1  $\mu\text{g/ml}$  for triclosan were no growth observed after 24 hrs of incubation in MOPS glucose medium (Fig. S1B).

Figure S1

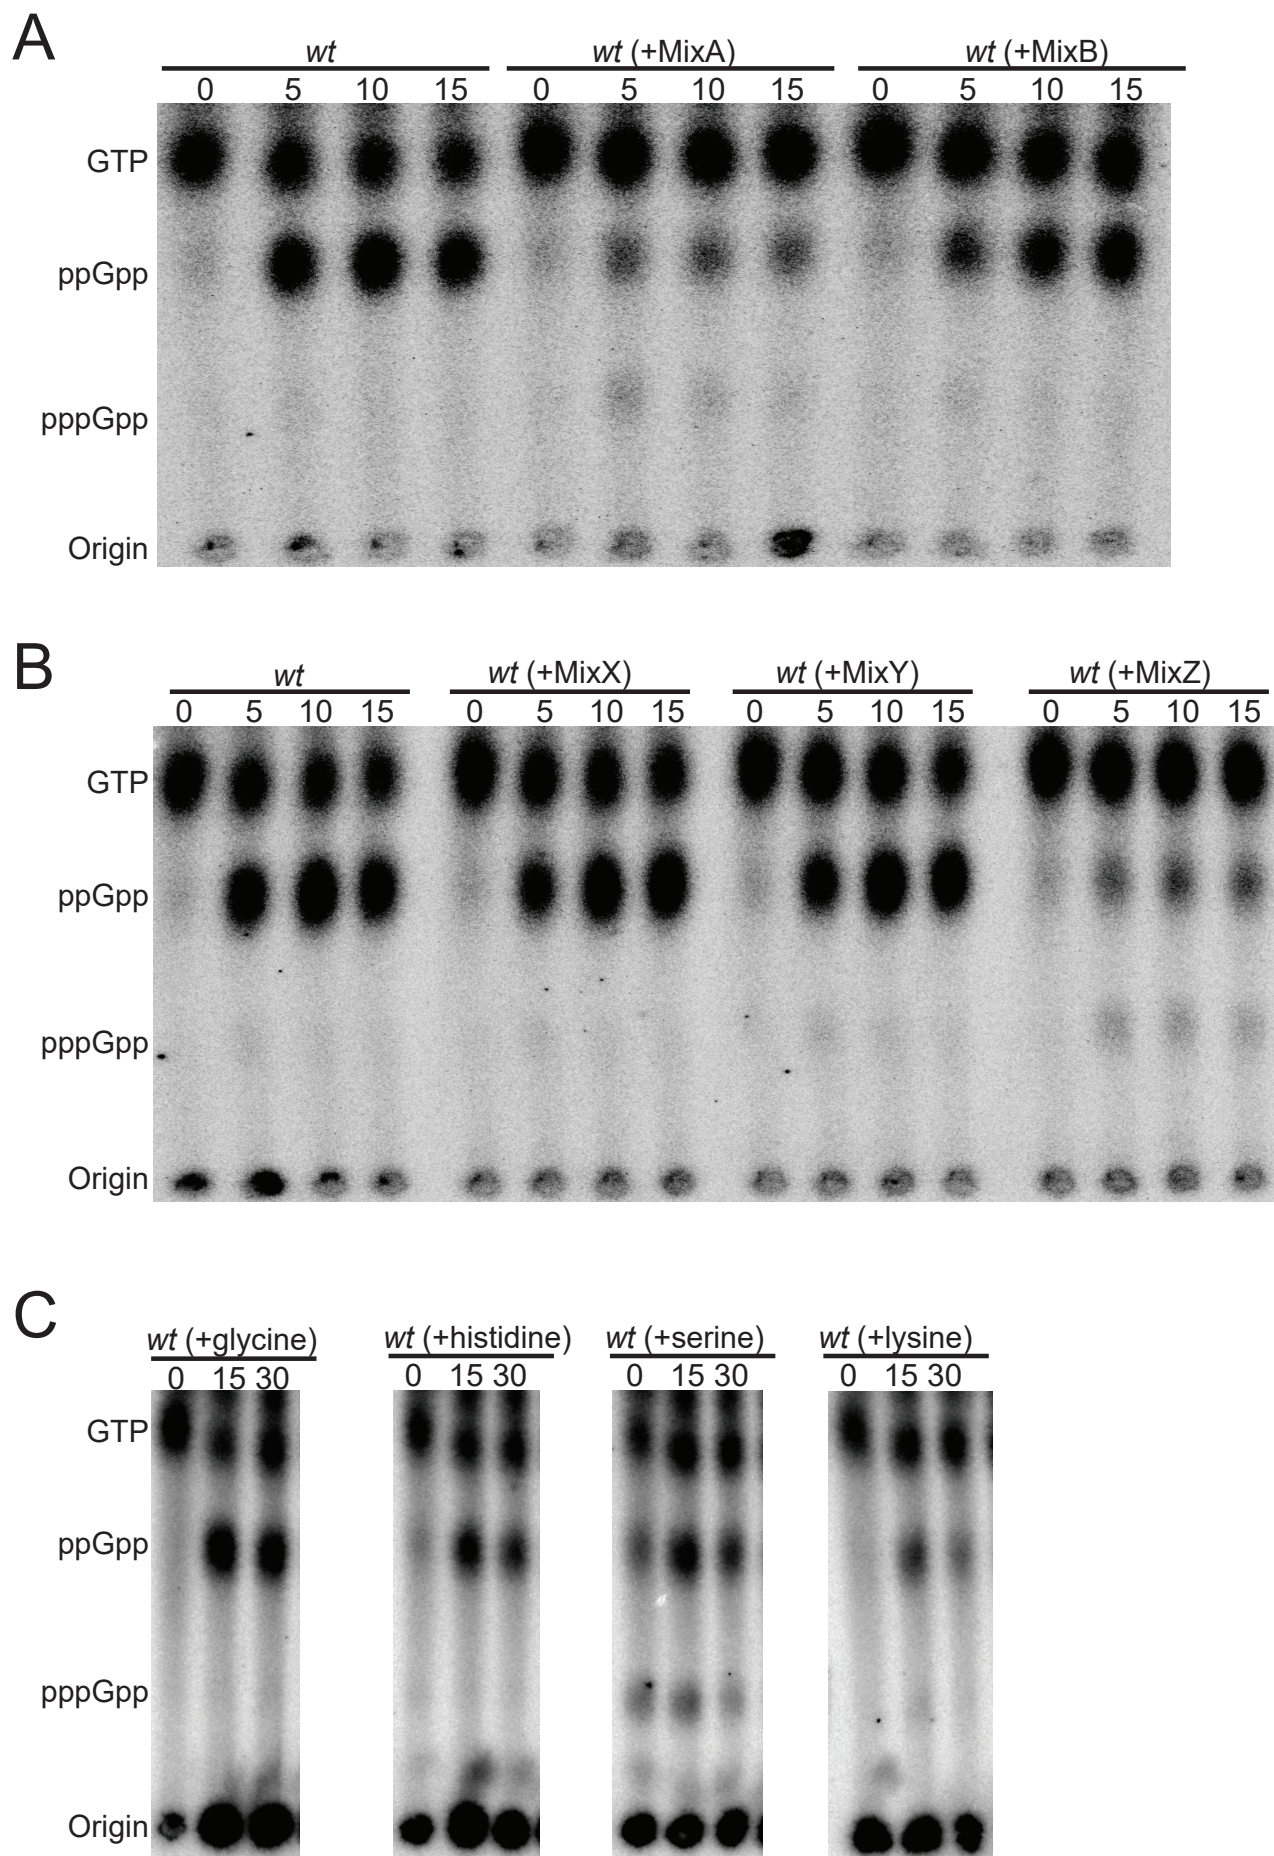

Figure S2



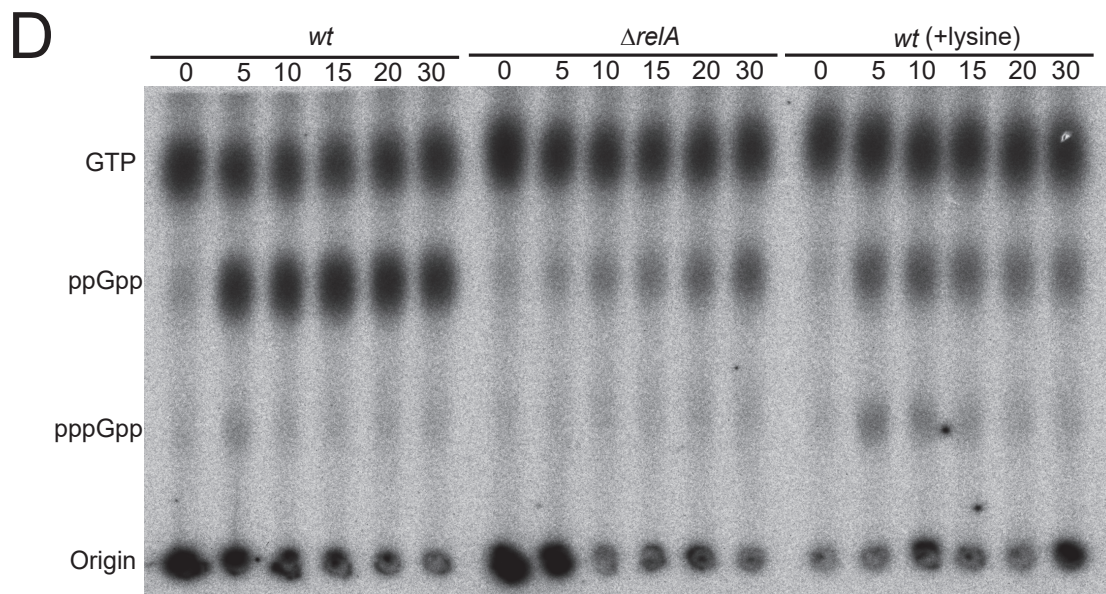

**Figure S2. Effect of amino acid mixture supplementation on stringent response during fatty acid (FA) starvation**

(A) Representative thin layer chromatogram (TLC) showing the time dependent (p)ppGpp accumulation upon cerulenin (200  $\mu$ g/ml) treatment in *wt* cells either without or pretreated with mixture of 10 amino acids each in mixA and in mixB. mixA (alanine, arginine, asparagine, aspartate, glutamate, glutamine, glycine, histidine, serine and lysine) and mixB (isoleucine, proline, tyrosine, threonine, tryptophan, valine, leucine, cysteine, methionine and phenylalanine)

(B) As in A but cultures were pretreated with mixture of amino acids from mixX, mixY or mixZ. mixX (alanine, arginine, asparagine), mixY (aspartate, glutamate, glutamine) and mixZ (glycine, histidine, serine and lysine).

(C) As in A, but cultures were pretreated with single amino acids glycine, histidine, serine or lysine. All amino acids were used at final concentration as recommended earlier (18). Positions of GTP, ppGpp and pppGpp are indicated. Time points above TLC images are in minutes after cerulenin treatment.

(D) Representative TLC showing the time dependent (p)ppGpp accumulation upon cerulenin (200  $\mu$ g/ml) treatment in *wt*,  $\Delta relA$  or *wt* (supplemented with 0.4 mM lysine).

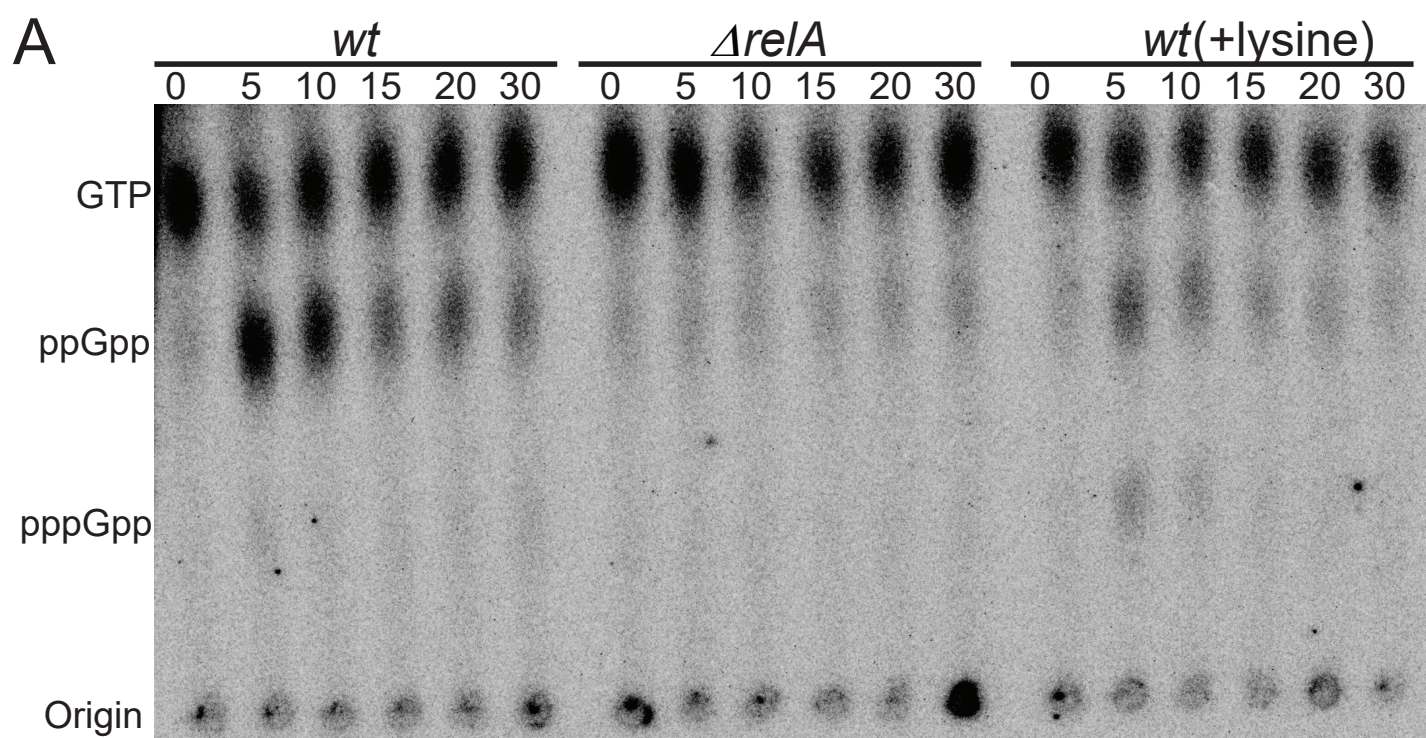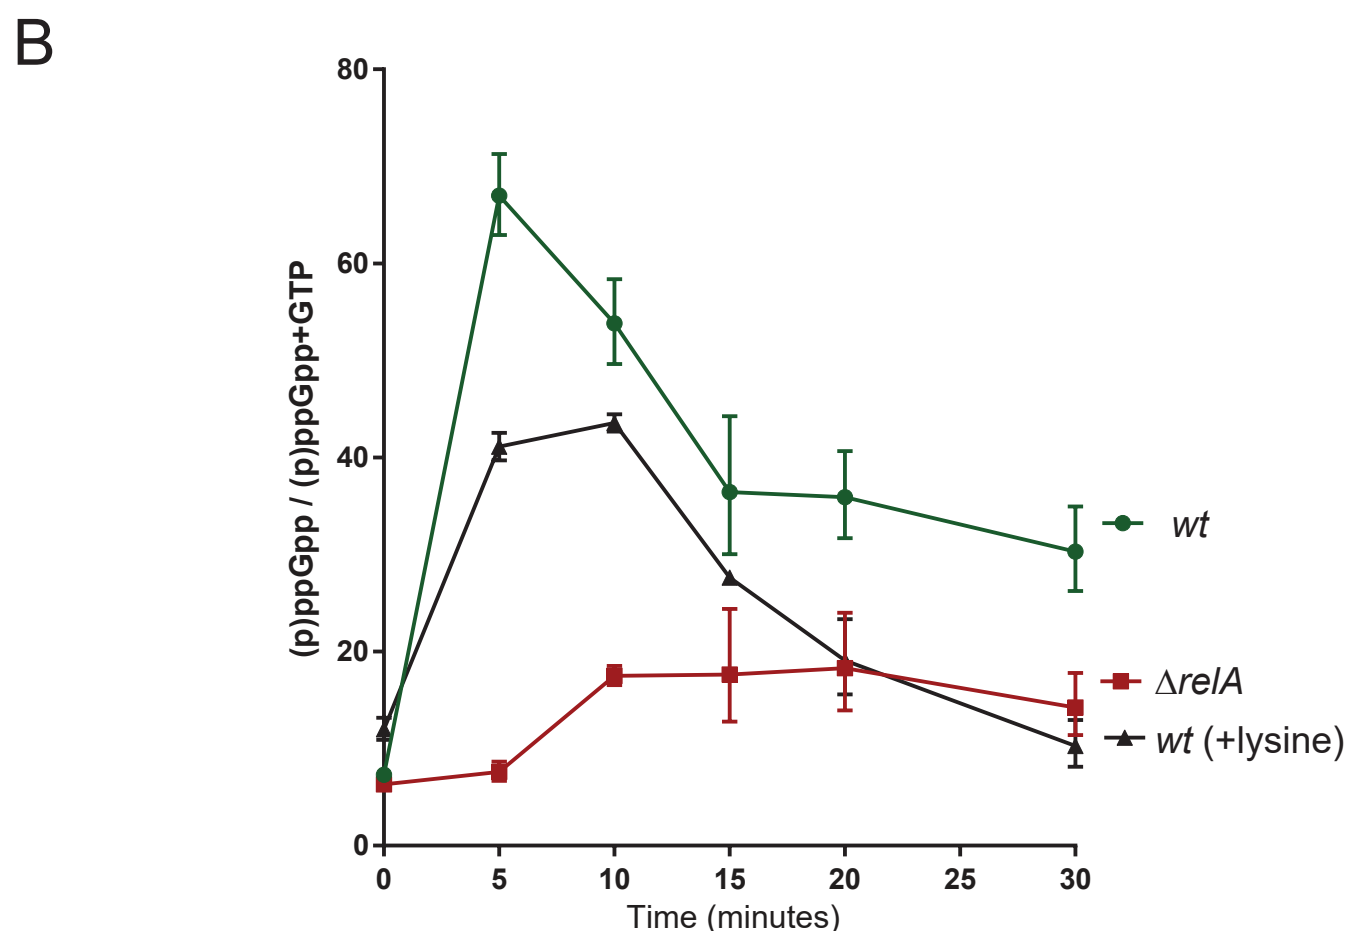

**Figure S3. Lysine supplementation also reduces stringent response during triclosan treatment**  
**(A)** Representative TLC image showing the time dependent (p)ppGpp accumulation upon triclosan (1  $\mu$ g/ml) treatment in wt,  $\Delta relA$  and wt (supplemented with 0.4 mM lysine).  
**(B)** Quantification of (p)ppGpp accumulation in wt,  $\Delta relA$  and wt (supplemented with 0.4 mM lysine) upon triclosan (1  $\mu$ g/ml) treatment. Data collected from three different experiments were used to calculate mean with standard deviation.

Figure S3

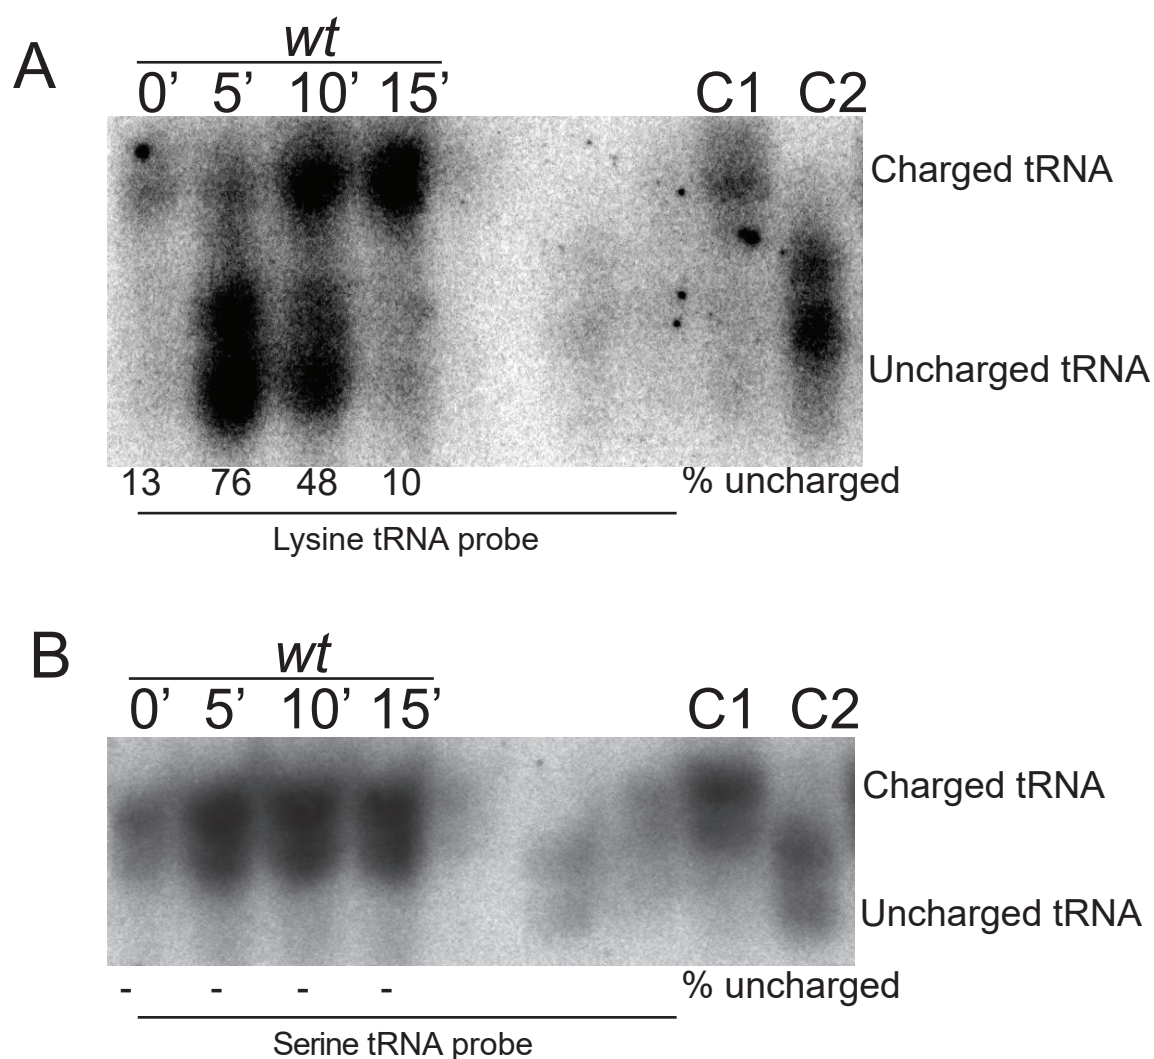

Figure S4



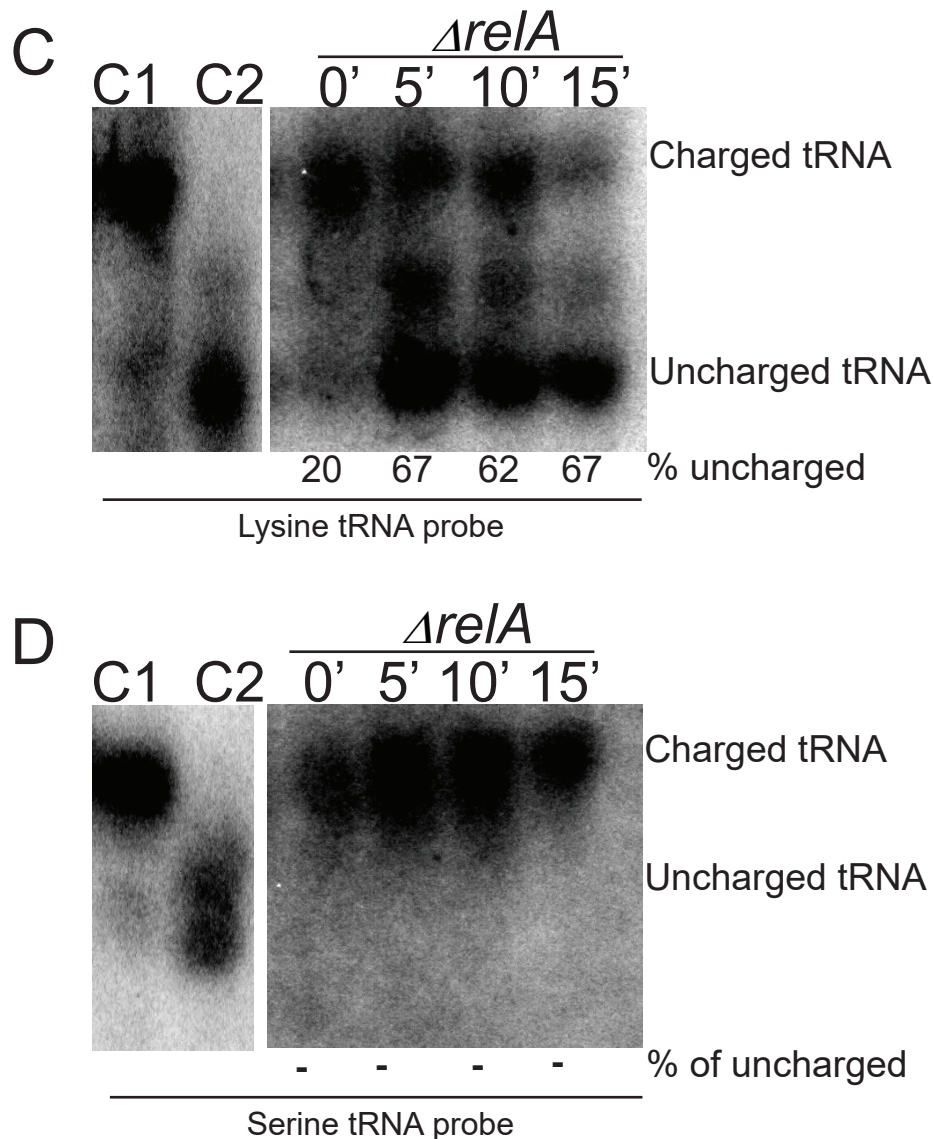

**Figure S4. tRNA acylation levels of *wt* and  $\Delta relA$  cells before and after triclosan (1 $\mu$ g/ml) treatment**

Total tRNA isolated from *wt* (A) or  $\Delta relA$  (C) cells before and 5, 10, 15 minutes after triclosan (1 $\mu$ g/ml) treatment and processed for Northern blotting analysis using an probe specific to tRNA<sup>lys</sup>. Percentage (%) of uncharged RNA was quantified according to signal intensity of uncharged/(charged+uncharged). A fraction of tRNA was deacylated *in-vitro* by base treatment (100 mM Tris-HCl [pH-9]) for control. Positions of charged (C1) and uncharged (C2) controls are shown. (B) & (D) Blots in (A) & (C) are hybridized with tRNA<sup>ser</sup> specific probe respectively.

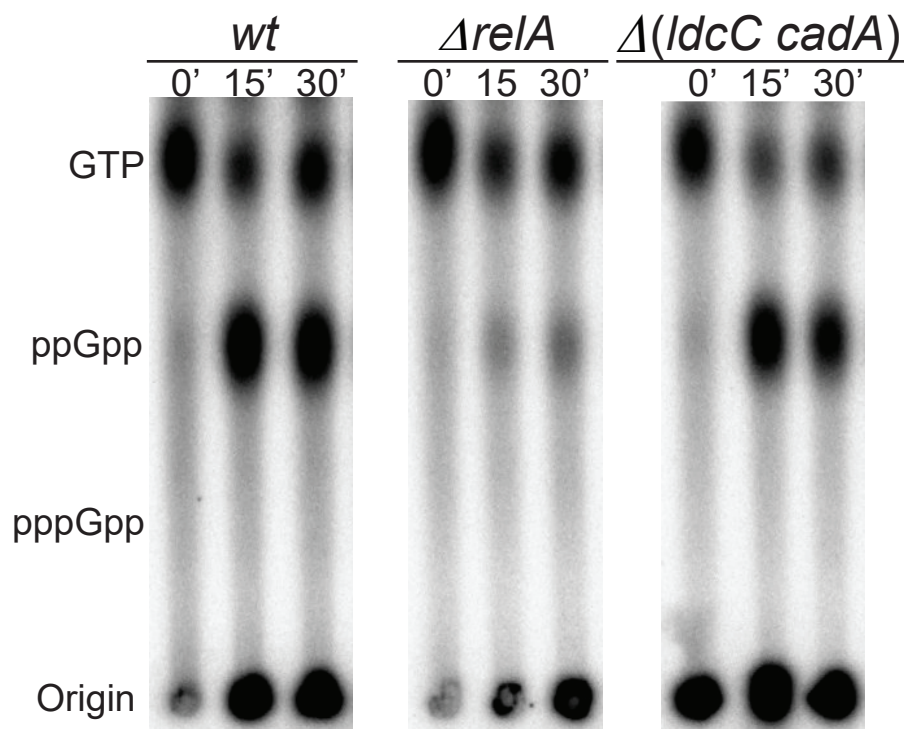

**Figure S5. Lysine decarboxylase mutant does not affect the stringent response after fatty acid starvation**

Representative TLC image showing the time dependent (p)ppGpp accumulation upon cerulenin (200  $\mu$ g/ml) treatment in *wt*,  $\Delta relA$  and in  $\Delta ldcC\ \Delta cadA$  mutant. The positions of GTP, ppGpp and pppGpp are indicated. Time-points above TLCs are in minutes after cerulenin treatment.

Figure S5

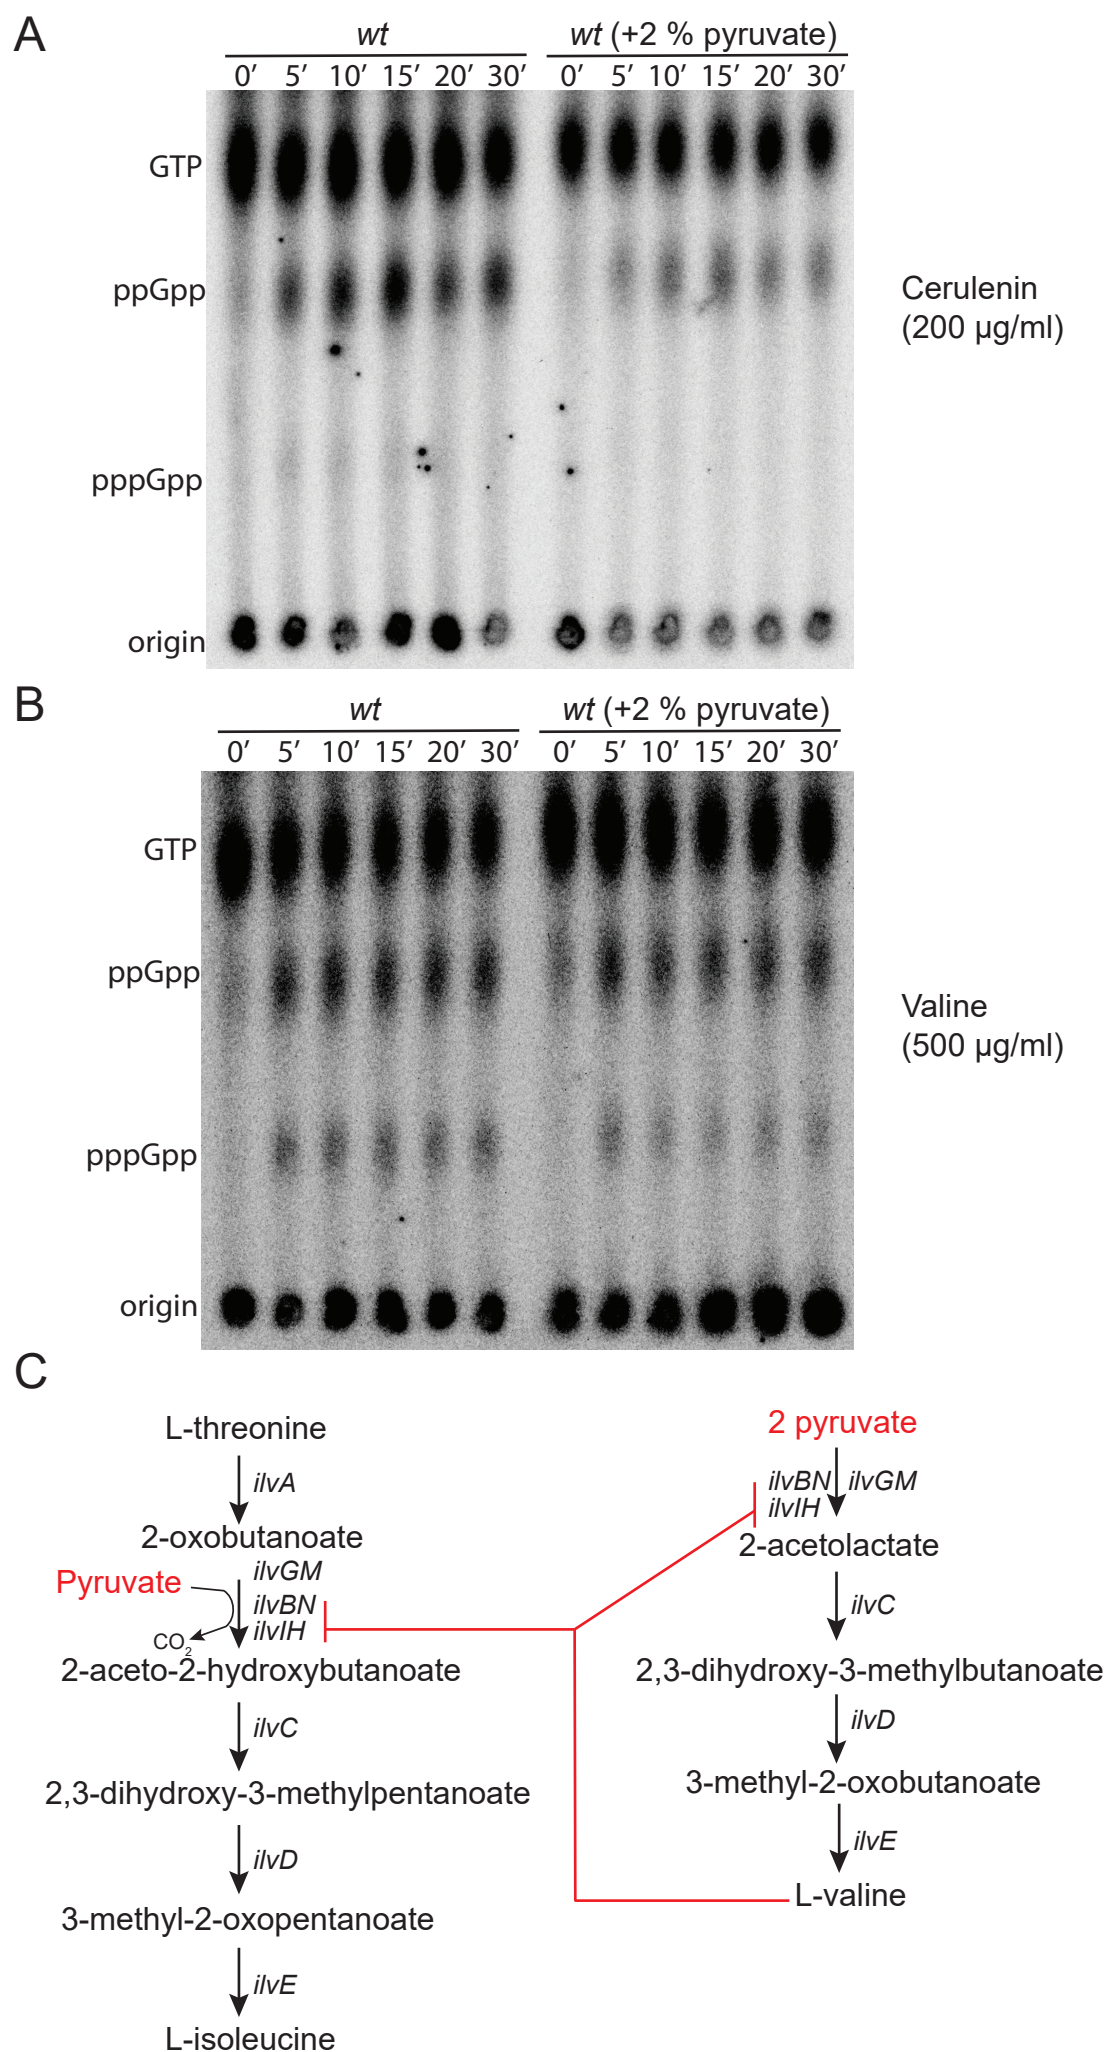

Figure S6

**Figure S6. Effect of pyruvate supplementation on stringent response**

- (A) (p)ppGpp accumulation upon cerulenin (200 µg/ml) treatment in *wt* with and without pretreatment with 2% pyruvate. Levels of (p)ppGpp were measured as described in the Legend to Fig. 1.
- (B) Representative TLC image showing the time dependent (p)ppGpp accumulation upon valine (500 µg/ml) treatment in *wt* (untreated) and when pretreated with 2% pyruvate. Positions of GTP, ppGpp and pppGpp are indicated. Time points above TLC images are in minutes after cerulenin or valine treatment. Levels of (p)ppGpp were measured as described in the Legend to Fig. 1.
- (C) Schematic representation of valine and isoleucine biosynthesis pathways in *E. coli* K-12 ([Keseler et al., 2017](#)). Excess valine inhibits enzymes that use pyruvate as one of the substrates (shown in red). Pyruvate supplementation has previously been shown to relax this inhibition in a competitive manner ([Leavitt & Umbarger, 1962](#)).

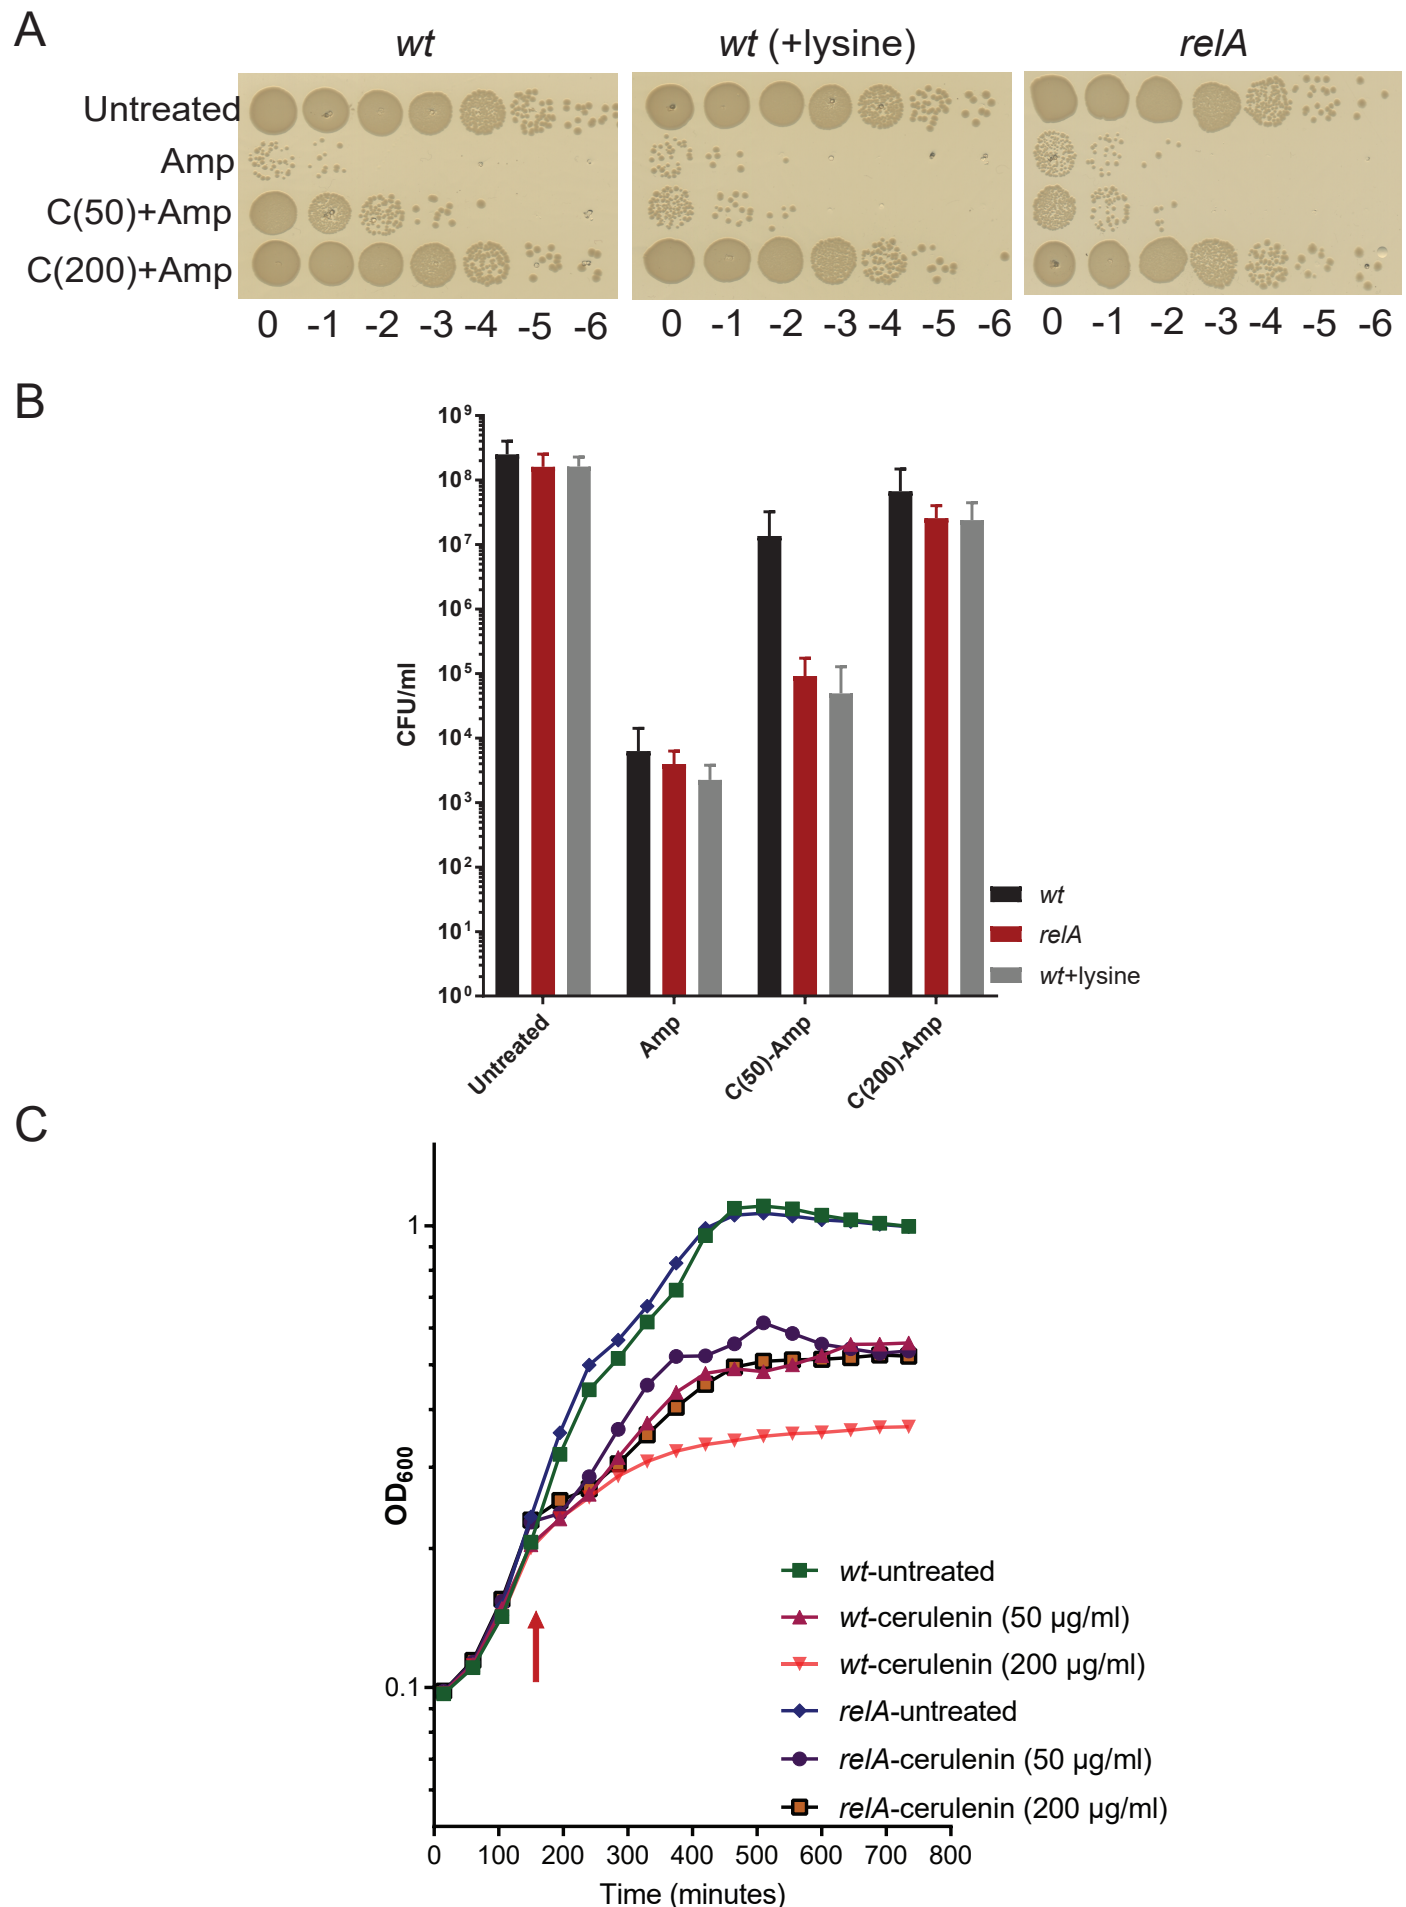

Figure S7



**Figure S7. Fatty acid starvation increases tolerance to ampicillin**

**(A)** *wt* and  $\Delta relA$  cells growing balanced in MOPS+0.2 % glucose media were either left untreated, directly exposed to ampicillin (100  $\mu$ g/ml) for 3 hrs or first treated with cerulenin (either 50 or 200  $\mu$ g/ml) for 5 minutes and then exposed to ampicillin. In another culture of the *wt* strain, 0.4 mM lysine was added and then processed in the same way to analyse the effect of lysine on ampicillin tolerance.

**(B)** Colony forming units (CFU) from four different experiments, performed as in A. Means and standard deviations are indicated.

**(C)** Cells of *wt* and  $\Delta relA$  strains growing balanced in MOPS + 0.2 % glucose medium measured in a plate reader up to OD<sub>600</sub> ~0.2 and then cerulenin was added (50 or 200  $\mu$ g/ml). Arrow indicates addition of cerulenin. Growth rate was monitored at 15' intervals for 12-14 hrs. Results represent the average of four experiments.
